# Supplementary material for: Facile synthesis of quinoxaline annulated perfluoroalkylated benzoazepine derivatives
Source: Royal Society of Chemistry journal article supplement (doi:10.1039/c6ra22727a), 2016-01-01
Supplement: c6ra22727a1.pdf [file c6ra22727a1.pdf]

## Facile Synthesis of Quinoxaline Annulated Perfluoroalkylated

### Benzoazepine Derivatives

Gang Liu,<sup>a,†</sup> Xuechun Sun,<sup>a,†</sup> Ling Chen,<sup>a</sup> Yueci Wu,<sup>a</sup> Jing Han,<sup>a</sup> Jie Chen,<sup>a</sup> Hongmei Deng,<sup>b</sup>  
Min Shao,<sup>b</sup> Hui Zhang,<sup>\*,a,b</sup> and Weiguo Cao<sup>\*,a,c,d,e</sup>

[a] Department of Chemistry, Innovative Drug Research Center, Shanghai University, Shanghai 200444, P. R. China

E-mail: wgcao@staff.shu.edu.cn; yehao7171@shu.edu.cn

[b] Laboratory for Microstructures and Instrumental Analysis and Research Center, Shanghai University, Shanghai 200444, P. R. China

[c] State Key Laboratory of Organometallic Chemistry, Shanghai Institute of Organic Chemistry, Chinese Academy of Sciences, Shanghai 200032, P. R. China

[d] Key Laboratory of Organofluorine Chemistry, Shanghai Institute of Organic Chemistry, Chinese Academy of Sciences, Shanghai 200032, P. R. China

[e] Key Laboratory of Synthetic Organic Chemistry of Natural Substances, Shanghai Institute of Organic Chemistry, Chinese Academy of Sciences, Shanghai 200032, P. R. China

[†] With equal contribution to this work

## Supporting information

### Table of contents

|                                                                                                         |           |
|---------------------------------------------------------------------------------------------------------|-----------|
| <b>1. General information.....</b>                                                                      | <b>S2</b> |
| <b>2. General procedure for the preparation of 3-(2-aminophenyl)quinoxalin-2(1H)-ones 1.....</b>        | <b>S2</b> |
| <b>3. General procedure for the preparation of 6-perfluoroalkylated benzoazepinoquinoxalines 3.....</b> | <b>S2</b> |
| <b>4. Characterization of products.....</b>                                                             | <b>S2</b> |
| <b>5. NMR spectra of products.....</b>                                                                  | <b>S8</b> |

## 1. General information

Reagents and solvents were purchased from commercial sources and used without further purification. Methyl perfluoroalk-2-ynoates were prepared according to the known literature. Melting points were recorded on a WRS-1 instrument and are uncorrected.  $^1\text{H}$ ,  $^{19}\text{F}$  and  $^{13}\text{C}$  NMR spectra were recorded on a Bruker DRX- 500 MHz spectrometer. All chemical shifts are reported in parts per million downfield (positive) of the standard:  $\text{C}_6\text{F}_6$  for  $^{19}\text{F}$ , TMS for  $^1\text{H}$  and  $^{13}\text{C}$  NMR spectra. IR spectra were obtained on an AVATAR370 FTIR spectrometer. LR-MS (lower resolution mass spectra) and HR-MS (high resolution mass spectra) were obtained on LCMS 2020 and Bruker Daltonics APEXIII 7.0 TESALA FTMS instruments, respectively. X-ray analysis was performed on a Bruker Smart Apex2 CCD spectrometer. Yields reported in this publication refer to isolated ones of compounds and their purity was determined by  $^1\text{H}$  NMR.

## 2. General procedure for the preparation of 3-(2-aminophenyl)quinoxalin-2(1H)-ones **1**

A mixture of *o*-phenylenediamine (5.0 mmol), isatin (5.0 mmol), and  $\text{PhCOOH}$  (5.0 mmol) was stirred in 1,4-dioxane (10 mL) at room temperature. Progress of the reaction was monitored by thin-layer chromatography. After completion of the reaction, the precipitate was filtered, washed with 1,4-dioxane and dried to give pure compound **1**.

## 3. General procedure for the preparation of 6-perfluoroalkylated benzoazepinoquinoxalines **3**

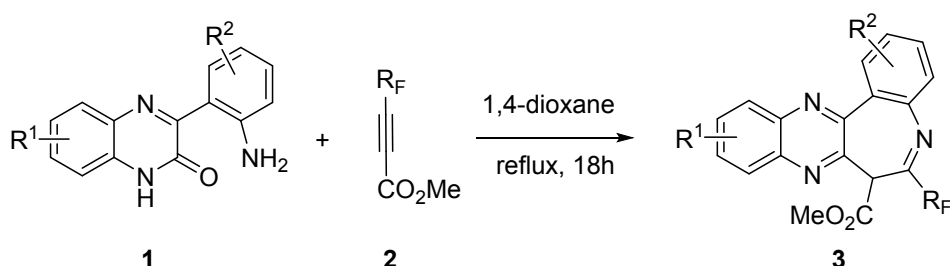

A yellow suspension of 3-(2-aminophenyl)quinoxalin-2(1H)-ones **1** (1.0 mmol) and methyl perfluoroalk-2-ynoates **2** (1.2 mmol) in 1,4-dioxane (10.0 mL) was stirred under reflux. After 18 h, a deep yellow solution was obtained. The solvent was removed under vacuum, and the residue was purified by column chromatography on silica gel (petroleum ether/ethyl acetate) to give **3**.

## 4. Characterization of products

**3-(2-Aminophenyl)quinoxalin-2(1H)-one **1a****<sup>12</sup>: yellow solid; m.p.: 205.2-206.5 °C; yield: 80% ;  $^1\text{H}$  NMR (500 MHz,  $\text{DMSO-}d_6$ )  $\delta$ : 6.45 (s, 2H), 6.56-6.59 (m, 1H), 6.80-6.82 (m, 1H), 7.13-7.16 (m, 1H), 7.29-7.32 (m, 2H), 7.49-7.53 (m, 1H), 7.80-7.81 (m, 1H), 8.08-8.10 (m, 1H), 12.48 (s, 1H) ppm;

**3-(2-Amino-5-chlorophenyl)quinoxalin-2(1H)-one **1b****<sup>13</sup>: white solid; m.p.: 276.4-277.8 °C; yield: 62%;  $^1\text{H}$  NMR (500 MHz,  $\text{DMSO-}d_6$ )  $\delta$ : 6.74 (s, 2H), 6.84 (d,  $J = 8.8$  Hz, 1H), 7.17-7.19 (m, 1H), 7.30-7.34 (m, 2H), 7.51-7.54 (m, 1H), 7.83-7.85 (m, 1H), 8.25 (d,  $J = 2.6$  Hz, 1H), 12.57 (s, 1H) ppm;

**3-(2-Amino-5-methylphenyl)quinoxalin-2(1H)-one 1c:** yellow solid; m.p.: 214.6-216.0 °C; yield: 31%; <sup>1</sup>H NMR (500 MHz, DMSO-*d*<sub>6</sub>) δ: 2.19 (s, 3H), 6.17 (brs, 2H), 6.72-6.74 (m, 1H), 6.97-6.99 (m, 1H), 7.29-7.33 (m, 2H), 7.49-7.52 (m, 1H), 7.79-7.80 (m, 1H), 7.86 (s, 1H), 12.47 (brs, 1H) ppm; <sup>13</sup>C NMR (125 MHz, DMSO-*d*<sub>6</sub>) δ: 20.7, 115.4, 116.9, 118.3, 123.3, 123.7, 128.5, 130.1, 131.7, 131.8, 132.0, 132.1, 146.8, 155.1, 156.6 ppm; IR (KBr): ν 3418, 1628, 1432, 1381, 1030, 881 cm<sup>-1</sup>; MS (ESI) m/z (%): 251 [M]<sup>+</sup>. HRMS (ESI) calcd. for C<sub>15</sub>H<sub>13</sub>N<sub>3</sub>O [M]<sup>+</sup>: 251.1059, found: 251.1053.

**3-(2-Amino-5-methoxyphenyl)quinoxalin-2(1H)-one 1d:** orange solid; m.p.: 226.8-228.1 °C; yield: 41%; <sup>1</sup>H NMR (500 MHz, DMSO-*d*<sub>6</sub>) δ: 3.68 (s, 3H), 6.03 (brs, 2H), 6.77-6.79 (m, 1H), 6.86-6.88 (m, 1H), 7.30-7.34 (m, 2H), 7.50-7.53 (m, 1H), 7.73-7.74 (m, 1H), 7.80-7.82 (m, 1H), 12.45 (brs, 1H) ppm; <sup>13</sup>C NMR (125 MHz, DMSO-*d*<sub>6</sub>) δ: 55.9, 115.4, 116.1, 117.8, 118.7, 118.8, 123.8, 128.5, 130.2, 131.8, 132.0, 143.4, 149.7, 155.1, 156.1 ppm; IR (KBr): ν 3423, 2897, 1629, 1432, 1382, 1043, 896 cm<sup>-1</sup>; MS (ESI) m/z (%): 267 [M]<sup>+</sup>. HRMS (ESI) calcd. for C<sub>15</sub>H<sub>13</sub>N<sub>3</sub>O<sub>2</sub> [M]<sup>+</sup>: 267.1008, found: 267.1024.

**3-(2-Amino-3-bromophenyl)quinoxalin-2(1H)-one 1e:** pale yellow solid; m.p.: 240.9-241.5 °C; yield: 89%; <sup>1</sup>H NMR (500 MHz, DMSO-*d*<sub>6</sub>) δ: 6.17 (brs, 2H), 6.58-6.61 (m, 1H), 7.32-7.35 (m, 2H), 7.52-7.57 (m, 2H), 7.78-7.80 (m, 1H), 7.86-7.88 (m, 1H), 12.57 (brs, 1H) ppm; <sup>13</sup>C NMR (125 MHz, DMSO-*d*<sub>6</sub>) δ: 109.7, 115.5, 116.5, 120.5, 123.8, 128.7, 130.7, 131.3, 131.8, 132.5, 134.3, 145.0, 154.9, 156.2 ppm; IR (KBr): ν 3415, 1659, 1452, 1253, 1072, 771 cm<sup>-1</sup>; MS (ESI) m/z (%): 315 [M]<sup>+</sup>. HRMS (ESI) calcd. for C<sub>14</sub>H<sub>10</sub>BrN<sub>3</sub>O [M]<sup>+</sup>: 315.0007, found: 315.0025.

**3-(2-Amino-4-bromophenyl)quinoxalin-2(1H)-one 1f:** yellow solid; m.p.: 230.5-231.0 °C; yield: 69%; <sup>1</sup>H NMR (500 MHz, DMSO-*d*<sub>6</sub>) δ: 6.71- 6.73 (m, 1H), 6.82 (brs, 2H), 7.04 (s, 1H), 7.29-7.32 (m, 2H), 7.50-7.53 (m, 1H), 7.82-7.84 (m, 1H), 8.14-8.16 (m, 1H), 12.53 (brs, 1H) ppm; <sup>13</sup>C NMR (125 MHz, DMSO-*d*<sub>6</sub>) δ: 115.4, 116.6, 117.5, 118.4, 123.7, 124.5, 128.5, 130.3, 131.6, 132.0, 133.7, 150.8, 155.1, 155.3 ppm; IR (KBr): ν 3419, 1653, 1490, 1295, 1003, 750 cm<sup>-1</sup>; MS (ESI) m/z (%): 315 [M]<sup>+</sup>. HRMS (ESI) calcd. for C<sub>14</sub>H<sub>10</sub>BrN<sub>3</sub>O [M]<sup>+</sup>: 315.0007, found: 315.0025.

**3-(2-Amino-5-bromophenyl)quinoxalin-2(1H)-one 1g<sup>13</sup>:** yellow solid; m.p.: 287.3-289.1; yield: 43%; <sup>1</sup>H NMR (500 MHz, DMSO-*d*<sub>6</sub>) δ: 6.75- 6.80 (m, 3H), 7.27-7.33 (m, 3H), 7.51-7.54 (m, 1H), 7.84 (d, *J* = 7.8 Hz, 1H), 8.36 (s, 1H), 12.56 (s, 1H) ppm;

**3-(2-Aminophenyl)-7-chloroquinoxalin-2(1H)-one 1h:** yellow solid; m.p.: 245.3-245.9 °C; yield: 27%; <sup>1</sup>H NMR (500 MHz, DMSO-*d*<sub>6</sub>) δ: 6.58 (brs, 3H), 6.81-6.82 (m, 1H), 7.15 (s, 1H), 7.29-7.31 (m, 1H), 7.53-7.54 (m, 1H), 7.94 (s, 1H), 8.15-8.17 (m, 1H), 12.55 (brs, 1H) ppm; <sup>13</sup>C NMR (125 MHz, DMSO-*d*<sub>6</sub>) δ: 114.9, 116.8, 116.9, 117.2, 127.3, 127.5, 129.8, 130.9, 131.6, 132.0, 132.4, 149.5, 155.0, 157.4 ppm; IR (KBr): ν 3459, 1656, 1481, 1247, 996, 751 cm<sup>-1</sup>; MS (ESI) m/z (%): 271 [M]<sup>+</sup>. HRMS (ESI) calcd. for C<sub>14</sub>H<sub>10</sub>ClN<sub>3</sub>O [M]<sup>+</sup>: 271.0512, found: 271.0522.

**3-(2-Aminophenyl)-6,7-dimethylquinoxalin-2(1H)-one 1i:** yellow solid; m.p.: 237.8-239.5 °C; yield: 62%; <sup>1</sup>H NMR (500 MHz, DMSO-*d*<sub>6</sub>) δ: 2.30 (s, 3H), 2.33 (s, 3H), 6.43 (s, 2H), 6.56-6.59 (m, 1H), 6.79-6.81 (m, 1H), 7.08 (s, 1H), 7.11-7.15 (m, 1H), 7.58 (s, 1H), 8.09-8.10

(m, 1H), 12.37 (s, 1H) ppm;  $^{13}\text{C}$  NMR (125 MHz, DMSO- $d_6$ )  $\delta$ : 19.4, 20.2, 115.1, 115.4, 116.7, 118.2, 128.3, 130.0, 130.2, 131.0, 131.8, 132.5, 139.8, 149.0, 155.1, 155.2 ppm; IR (KBr):  $\nu$  3428, 1642, 1388, 1262, 1115, 741  $\text{cm}^{-1}$ ; MS (ESI)  $m/z$  (%): 265 [M] $^+$ . HRMS (ESI) calcd. for  $\text{C}_{14}\text{H}_{10}\text{BrN}_3\text{O}$  [M] $^+$ : 265.1213, found: 265.1215.

**3-(2-Aminophenyl)-7-methoxyquinoxalin-2(1H)-one 1j**: yellowish brown solid; m.p.: 224.0-224.5  $^\circ\text{C}$ ; yield: 30%;  $^1\text{H}$  NMR (500 MHz, DMSO- $d_6$ )  $\delta$ : 3.84 (s, 3H), 6.54-6.60 (m, 3H), 6.81-6.83 (m, 1H), 7.13-7.17 (m, 2H), 7.24-7.26 (m, 1H), 7.36 (s, 1H), 8.14-8.16 (m, 1H), 12.42 (brs, 1H) ppm;  $^{13}\text{C}$  NMR (125 MHz, DMSO- $d_6$ )  $\delta$ : 56.1, 110.0, 115.0, 116.2, 116.7, 118.1, 119.4, 126.1, 131.2, 132.0, 132.4, 149.2, 154.8, 155.9, 156.5 ppm; IR (KBr):  $\nu$  3485, 2952, 1613, 1493, 1279, 1161, 1036, 749  $\text{cm}^{-1}$ ; MS (ESI)  $m/z$  (%): 267 [M] $^+$ . HRMS (ESI) calcd. for  $\text{C}_{15}\text{H}_{13}\text{N}_3\text{O}_2$  [M] $^+$ : 267.1008, found: 267.1024.

**Methyl 6-(trifluoromethyl)-7H-benzo[2,3]azepino[4,5-b]quinoxaline-7-carboxylate 3a**: white solid; m.p.: 162.0-163.2  $^\circ\text{C}$ ;  $^1\text{H}$  NMR (500 MHz,  $\text{CDCl}_3$ )  $\delta$ : 3.30 (s, 3H), 5.57 (s, 1H), 7.52-7.57 (m, 2H), 7.63-7.66 (m, 1H), 7.83-7.90 (m, 2H), 8.18-8.20 (m, 1H), 8.24-8.26 (m, 1H), 8.30-8.31 (m, 1H) ppm;  $^{13}\text{C}$  NMR (125 MHz,  $\text{CDCl}_3$ )  $\delta$ : 53.1, 53.4, 119.2 (q,  $^1J_{\text{C-F}} = 276.0$  Hz,  $\text{CF}_3$ ), 127.2, 128.1, 129.1, 129.6, 130.7, 130.9, 131.0, 131.1, 142.1, 142.5, 142.6, 147.8, 148.2, 150.4 (q,  $^2J_{\text{C-F}} = 35.7$  Hz,  $\text{CF}_3$ ), 165.7 ppm;  $^{19}\text{F}$  NMR (470 MHz,  $\text{CDCl}_3$ )  $\delta$ : -72.6 (s,  $\text{CF}_3$ ) ppm; IR (KBr):  $\nu$  2948, 1741, 1630, 1443, 1377, 1356, 1284, 1211, 1188, 1127, 760  $\text{cm}^{-1}$ ; MS (DART)  $m/z$  (%): 372 [(M+H)] $^+$ . HRMS (DART) calcd. for  $\text{C}_{19}\text{H}_{13}\text{F}_3\text{N}_3\text{O}_2$  [(M+H)] $^+$ : 372.0954; found: 372.0951.

**Methyl 2-chloro-6-(trifluoromethyl)-7H-benzo[2,3]azepino[4,5-b]quinoxaline-7-carboxylate 3b**: yellow solid; m.p.: 162.2-163.4  $^\circ\text{C}$ ;  $^1\text{H}$  NMR (500 MHz,  $\text{CDCl}_3$ )  $\delta$ : 3.38 (s, 3H), 5.59 (s, 1H), 7.51-7.52 (m, 1H), 7.59-7.61 (m, 1H), 7.86-7.92 (m, 2H), 8.19-8.20 (m, 1H), 8.25-8.27 (m, 1H), 8.32-8.33 (m, 1H) ppm;  $^{13}\text{C}$  NMR (125 MHz,  $\text{CDCl}_3$ )  $\delta$ : 53.3, 53.4, 119.1 (q,  $^1J_{\text{C-F}} = 276.2$  Hz,  $\text{CF}_3$ ), 128.9, 129.1, 129.5, 129.6, 130.6, 131.1, 131.2, 134.0, 140.9, 142.3, 142.5, 146.8, 147.1, 150.6 (q,  $^2J_{\text{C-F}} = 35.8$  Hz,  $\text{CF}_3$ ), 165.6 ppm;  $^{19}\text{F}$  NMR (470 MHz,  $\text{CDCl}_3$ )  $\delta$ : -72.6 (s,  $\text{CF}_3$ ) ppm; IR (KBr):  $\nu$  2918, 1744, 1635, 1436, 1361, 1252, 1201, 1143, 772  $\text{cm}^{-1}$ ; MS (DART)  $m/z$  (%): 406 [(M+H)] $^+$ . HRMS (DART) calcd. for  $\text{C}_{19}\text{H}_{12}\text{ClF}_3\text{N}_3\text{O}_2$  [(M+H)] $^+$ : 406.0565, found: 406.0560.

**Methyl 2-methyl-6-(trifluoromethyl)-7H-benzo[2,3]azepino[4,5-b]quinoxaline-7-carboxylate 3c**: yellow solid; m.p.: 150.8-152.2  $^\circ\text{C}$ ;  $^1\text{H}$  NMR (500 MHz,  $\text{CDCl}_3$ )  $\delta$ : 2.53 (s, 3H), 3.33 (s, 3H), 5.55 (s, 1H), 7.45 (s, 2H), 7.83-7.89 (m, 2H), 8.10 (s, 1H), 8.18-8.19 (m, 1H), 8.25-8.26 (m, 1H) ppm;  $^{13}\text{C}$  NMR (125 MHz,  $\text{CDCl}_3$ )  $\delta$ : 21.3, 53.1, 53.3, 119.3 (q,  $^1J_{\text{C-F}} = 276.0$  Hz,  $\text{CF}_3$ ), 127.4, 127.9, 129.1, 129.5, 130.6, 130.9, 131.2, 132.1, 138.4, 140.3, 142.1, 142.6, 147.8, 148.3, 149.5 (q,  $^2J_{\text{C-F}} = 35.5$  Hz,  $\text{CF}_3$ ), 165.9 ppm;  $^{19}\text{F}$  NMR (470 MHz,  $\text{CDCl}_3$ )  $\delta$ : -72.5 (s,  $\text{CF}_3$ ) ppm; IR (KBr):  $\nu$  2927, 1747, 1606, 1435, 1360, 1331, 1283, 1223, 1191, 1141, 766  $\text{cm}^{-1}$ ; MS (DART)  $m/z$  (%): 386 [(M+H)] $^+$ . HRMS (DART) calcd. for  $\text{C}_{20}\text{H}_{15}\text{F}_3\text{N}_3\text{O}_2$  [(M+H)] $^+$ : 386.1111, found: 386.1105.

**Methyl 2-methoxy-6-(trifluoromethyl)-7H-benzo[2,3]azepino[4,5-b]quinoxaline-7-carboxylate 3d**: yellow solid; m.p.: 166.3-167.6  $^\circ\text{C}$ ;  $^1\text{H}$  NMR (500 MHz,  $\text{CDCl}_3$ )  $\delta$ : 3.36 (s, 3H), 3.97 (s, 3H), 5.55 (s, 1H), 7.18-7.21 (m, 1H), 7.50-7.52 (m, 1H), 7.79 (s, 1H), 7.83-7.89 (m, 2H), 8.18-8.20 (m, 1H), 8.24-8.25 (m, 1H) ppm;  $^{13}\text{C}$  NMR (125 MHz,  $\text{CDCl}_3$ )  $\delta$ : 53.1,

53.3, 55.7, 114.0, 118.4, 119.4 (q,  $^1J_{C-F} = 275.8$  Hz, CF<sub>3</sub>), 129.1, 129.6, 130.7, 130.9, 136.3, 142.3, 142.5, 147.5, 148.0, 148.2 (q,  $^2J_{C-F} = 35.4$  Hz, CF<sub>3</sub>), 159.0, 166.1 ppm;  $^{19}F$  NMR (470 MHz, CDCl<sub>3</sub>)  $\delta$ : -72.3 (s, CF<sub>3</sub>) ppm; IR (KBr):  $\nu$  2958, 1744, 1631, 1484, 1339, 1254, 1229, 1192, 1131, 773 cm<sup>-1</sup>; MS (DART)  $m/z$  (%): 402 [(M+H)]<sup>+</sup>. HRMS (DART) calcd. for C<sub>20</sub>H<sub>15</sub>F<sub>3</sub>N<sub>3</sub>O<sub>3</sub> [(M+H)]<sup>+</sup>: 402.1060, found: 420.1056.

**Methyl 4-bromo-6-(trifluoromethyl)-7H-benzo[2,3]azepino[4,5-b]quinoxaline-7-carboxylate 3e**: yellow solid; m.p.: 161.1-162.9 °C;  $^1H$  NMR (500 MHz, CDCl<sub>3</sub>)  $\delta$ : 3.36 (s, 3H), 5.60 (s, 1H), 7.36-7.39 (m, 1H), 7.85-7.92 (m, 3H), 8.19-8.21 (m, 1H), 8.24-8.28 (m, 2H) ppm;  $^{13}C$  NMR (125 MHz, CDCl<sub>3</sub>)  $\delta$ : 53.2, 53.5, 119.0 (q,  $^1J_{C-F} = 276.4$  Hz, CF<sub>3</sub>), 121.4, 128.5, 129.1, 129.7, 130.4, 131.0, 131.2, 134.9, 140.7, 142.2, 142.4, 147.2, 147.3, 151.0 (q,  $^2J_{C-F} = 36.2$  Hz, CF<sub>3</sub>), 165.4 ppm;  $^{19}F$  NMR (470 MHz, CDCl<sub>3</sub>)  $\delta$ : -72.3 (s, CF<sub>3</sub>) ppm; IR (KBr):  $\nu$  2922, 1747, 1640, 1426, 1354, 1261, 1196, 1130, 779 cm<sup>-1</sup>; MS (DART)  $m/z$  (%): 450 [(M+H)]<sup>+</sup>. HRMS (DART) calcd. for C<sub>19</sub>H<sub>12</sub>BrF<sub>3</sub>N<sub>3</sub>O<sub>2</sub> [(M+H)]<sup>+</sup>: 450.0060, found: 450.0052.

**Methyl 3-bromo-6-(trifluoromethyl)-7H-benzo[2,3]azepino[4,5-b]quinoxaline-7-carboxylate 3f**: yellow solid; m.p.: 182.5-184.5 °C;  $^1H$  NMR (500 MHz, CDCl<sub>3</sub>)  $\delta$ : 3.38 (s, 3H), 5.59 (s, 1H), 7.64-7.67 (m, 1H), 7.76 (s, 1H), 7.84-7.90 (m, 2H), 8.18-8.25 (m, 3H) ppm;  $^{13}C$  NMR (125 MHz, CDCl<sub>3</sub>)  $\delta$ : 53.3, 53.5, 119.1 (q,  $^1J_{C-F} = 276.3$  Hz, CF<sub>3</sub>), 124.9, 127.1, 129.1, 129.6, 129.9, 130.9, 131.1, 131.3, 132.4, 142.2, 142.6, 143.3, 147.2, 147.3, 151.5 (q,  $^2J_{C-F} = 36.0$  Hz, CF<sub>3</sub>), 165.5 ppm;  $^{19}F$  NMR (470 MHz, CDCl<sub>3</sub>)  $\delta$ : -72.7 (s, CF<sub>3</sub>) ppm; IR (KBr):  $\nu$  2927, 1740, 1667, 1479, 1329, 1285, 1210, 1137, 765 cm<sup>-1</sup>; MS (DART)  $m/z$  (%): 450 [(M+H)]<sup>+</sup>. HRMS (DART) calcd. for C<sub>19</sub>H<sub>12</sub>BrF<sub>3</sub>N<sub>3</sub>O<sub>2</sub> [(M+H)]<sup>+</sup>: 450.0060, found: 450.0054.

**Methyl 2-bromo-6-(trifluoromethyl)-7H-benzo[2,3]azepino[4,5-b]quinoxaline-7-carboxylate 3g**: yellow solid; m.p.: 170.3-171.2 °C;  $^1H$  NMR (500 MHz, CDCl<sub>3</sub>)  $\delta$ : 3.38 (s, 3H), 5.59 (s, 1H), 7.43-7.45 (m, 1H), 7.73-7.76 (m, 1H), 7.86-7.92 (m, 2H), 8.18-8.20 (m, 1H), 8.25-8.27 (m, 1H), 8.48 (s, 1H) ppm;  $^{13}C$  NMR (125 MHz, CDCl<sub>3</sub>)  $\delta$ : 53.3, 53.4, 119.2 (q,  $^1J_{C-F} = 276.2$  Hz, CF<sub>3</sub>), 120.0, 129.0, 129.1, 129.7, 131.1, 131.2, 133.6, 134.0, 141.4, 142.3, 142.5, 146.7, 147.1, 150.7 (q,  $^2J_{C-F} = 35.9$  Hz, CF<sub>3</sub>), 165.5 ppm;  $^{19}F$  NMR (470 MHz, CDCl<sub>3</sub>)  $\delta$ : -72.6 (s, CF<sub>3</sub>) ppm; IR (KBr):  $\nu$  2945, 1749, 1356, 1326, 1131, 889, 826, 766 cm<sup>-1</sup>; MS (DART)  $m/z$  (%): 450 [(M+H)]<sup>+</sup>. HRMS (DART) calcd. for C<sub>19</sub>H<sub>12</sub>BrF<sub>3</sub>N<sub>3</sub>O<sub>2</sub> [(M+H)]<sup>+</sup>: 450.0060, found: 450.0059.

**Methyl 10-chloro-6-(trifluoromethyl)-7H-benzo[2,3]azepino[4,5-b]quinoxaline-7-carboxylate 3h**: white solid; m.p.: 104.5-105.9 °C;  $^1H$  NMR (500 MHz, CDCl<sub>3</sub>)  $\delta$ : 3.31 (s, 3H), 5.54 (s, 1H), 7.52-7.57 (m, 2H), 7.64-7.68 (m, 1H), 7.77-7.79 (m, 1H), 8.11-8.13 (m, 1H), 8.24-8.25 (m, 1H), 8.27-8.28 (m, 1H) ppm;  $^{13}C$  NMR (125 MHz, CDCl<sub>3</sub>)  $\delta$ : 53.1, 53.3, 119.2 (q,  $^1J_{C-F} = 276.0$  Hz, CF<sub>3</sub>), 127.2, 127.7, 128.2, 128.4, 130.3, 131.2, 131.3, 131.7, 136.9, 140.5, 142.6, 142.9, 147.9, 149.0, 150.3 (q,  $^2J_{C-F} = 35.8$  Hz, CF<sub>3</sub>), 165.6 ppm;  $^{19}F$  NMR (470 MHz, CDCl<sub>3</sub>)  $\delta$ : -72.6 (s, CF<sub>3</sub>) ppm; IR (KBr):  $\nu$  2953, 1743, 1636, 1480, 1334, 1286, 1195, 1127, 765 cm<sup>-1</sup>; MS (DART)  $m/z$  (%): 406 [(M+H)]<sup>+</sup>. HRMS (DART) calcd. for C<sub>19</sub>H<sub>12</sub>ClF<sub>3</sub>N<sub>3</sub>O<sub>2</sub> [(M+H)]<sup>+</sup>: 406.0565, found: 406.0561.

**Methyl 10,11-dimethyl-6-(trifluoromethyl)-7H-benzo[2,3]azepino[4,5-b]quinoxaline-7-**

**carboxylate 3i**: pale white solid; m.p.: 164.6-166.4 °C; <sup>1</sup>H NMR (500 MHz, CDCl<sub>3</sub>) δ: 2.55 (s, 6H), 3.29 (s, 3H), 5.52 (s, 1H), 7.50-7.55 (m, 2H), 7.60-7.63 (m, 1H), 7.92 (s, 1H), 7.99 (s, 1H), 8.26-8.28 (m, 1H) ppm; <sup>13</sup>C NMR (125 MHz, CDCl<sub>3</sub>) δ: 20.5, 53.0, 53.3, 119.3 (q, <sup>1</sup>J<sub>C-F</sub> = 276.0 Hz, CF<sub>3</sub>), 127.1, 127.9, 128.0, 128.4, 130.6, 130.9, 141.1, 141.7, 141.8, 142.5, 146.8, 147.2, 150.4 (q, <sup>2</sup>J<sub>C-F</sub> = 35.5 Hz, CF<sub>3</sub>), 165.9 ppm; <sup>19</sup>F NMR (470 MHz, CDCl<sub>3</sub>) δ: -72.6 (s, CF<sub>3</sub>) ppm; IR (KBr): ν 2946, 1744, 1630, 1482, 1346, 1284, 1199, 1128, 766 cm<sup>-1</sup>; MS (DART) m/z (%): 400 [(M+H)]<sup>+</sup>. HRMS (DART) calcd. for C<sub>21</sub>H<sub>17</sub>F<sub>3</sub>N<sub>3</sub>O<sub>2</sub> [(M+H)]<sup>+</sup>: 400.1267, found: 400.1263.

**Methyl 10-methoxy-6-(trifluoromethyl)-7H-benzo[2,3]azepino[4,5-b]quinoxaline-7-carboxylate 3j**: pale yellow solid; m.p.: 165.7-166.9 °C; <sup>1</sup>H NMR (500 MHz, CDCl<sub>3</sub>) δ: 3.30 (s, 3H), 4.01 (s, 3H), 5.51 (s, 1H), 7.47-7.56 (m, 4H), 7.61-7.65 (m, 1H), 8.04-8.06 (m, 1H), 8.28-8.29 (m, 1H) ppm; <sup>13</sup>C NMR (125 MHz, CDCl<sub>3</sub>) δ: 53.0, 55.9, 106.4, 119.3 (q, <sup>1</sup>J<sub>C-F</sub> = 276.0 Hz, CF<sub>3</sub>), 124.5, 127.2, 128.0, 128.3, 130.0, 130.8, 130.9, 142.5, 144.4, 145.2, 148.0, 150.6 (q, <sup>2</sup>J<sub>C-F</sub> = 35.6 Hz, CF<sub>3</sub>), 161.6, 166.0 ppm; <sup>19</sup>F NMR (470 MHz, CDCl<sub>3</sub>) δ: -72.6 (s, CF<sub>3</sub>) ppm; IR (KBr): ν 2964, 1741, 1621, 1442, 1343, 1285, 1229, 1194, 1123, 766 cm<sup>-1</sup>; MS (DART) m/z (%): 402 [(M+H)]<sup>+</sup>. HRMS (DART) calcd. for C<sub>20</sub>H<sub>15</sub>F<sub>3</sub>N<sub>3</sub>O<sub>3</sub> [(M+H)]<sup>+</sup>: 402.1060, found: 402.1053.

**Methyl 6-(pentafluoroethyl)-7H-benzo[2,3]azepino[4,5-b]quinoxaline-7-carboxylate 3k**: pale yellow solid; m.p.: 144.6-145.9 °C; <sup>1</sup>H NMR (500 MHz, CDCl<sub>3</sub>) δ: 3.29 (s, 3H), 5.65 (s, 1H), 7.52-7.56 (m, 2H), 7.63-7.66 (m, 1H), 7.83-7.90 (m, 2H), 8.18-8.20 (m, 1H), 8.25-8.26 (m, 1H), 8.30-8.32 (m, 1H) ppm; <sup>13</sup>C NMR (125 MHz, CDCl<sub>3</sub>) δ: 53.1, 53.4, 109.9 (tq, <sup>1</sup>J<sub>C-F</sub> = 255.0 Hz, <sup>2</sup>J<sub>C-F</sub> = 37.5 Hz, CF<sub>2</sub>), 118.4 (qt, <sup>1</sup>J<sub>C-F</sub> = 285.0 Hz, <sup>2</sup>J<sub>C-F</sub> = 35.4 Hz, CF<sub>3</sub>), 127.3, 127.9, 128.2, 129.1, 129.6, 130.7, 130.9, 131.0, 131.1, 142.1, 142.6, 142.8, 147.8, 148.1, 151.3 (t, <sup>2</sup>J<sub>C-F</sub> = 27.3 Hz, CF<sub>2</sub>), 165.8 ppm; <sup>19</sup>F NMR (470 MHz, CDCl<sub>3</sub>) δ: -117.3- -115.7 (m, CF<sub>2</sub>), -81.2 (s, CF<sub>3</sub>) ppm; IR (KBr): ν 2957, 1751, 1631, 1484, 1332, 1269, 1203, 1159, 1117, 766 cm<sup>-1</sup>; MS (DART) m/z (%): 422 [(M+H)]<sup>+</sup>. HRMS (DART) calcd. for C<sub>20</sub>H<sub>13</sub>F<sub>5</sub>N<sub>3</sub>O<sub>2</sub> [(M+H)]<sup>+</sup>: 422.0922, found: 422.0914.

**Methyl 2-methoxy-6-(pentafluoroethyl)-7H-benzo[2,3]azepino[4,5-b]quinoxaline-7-carboxylate 3l**: yellow solid; m.p.: 127.6-128.2 °C; <sup>1</sup>H NMR (500 MHz, CDCl<sub>3</sub>) δ: 3.35 (s, 3H), 3.98 (s, 3H), 5.62 (s, 1H), 7.18-7.20 (m, 1H), 7.48-7.50 (m, 1H), 7.79 (s, 1H), 7.83-7.90 (m, 2H), 8.18-8.20 (m, 1H), 8.25-8.27 (m, 1H) ppm; <sup>13</sup>C NMR (125 MHz, CDCl<sub>3</sub>) δ: 53.1, 53.3, 55.7, 110.0 (tq, <sup>1</sup>J<sub>C-F</sub> = 254.6 Hz, <sup>2</sup>J<sub>C-F</sub> = 37.5 Hz, CF<sub>2</sub>), 114.0, 118.4, 118.5 (qt, <sup>1</sup>J<sub>C-F</sub> = 285.1 Hz, <sup>2</sup>J<sub>C-F</sub> = 35.5 Hz, CF<sub>3</sub>), 129.1, 129.5, 129.6, 129.8, 130.7, 130.9, 136.6, 142.4, 142.5, 147.5, 147.9, 148.9 (t, <sup>2</sup>J<sub>C-F</sub> = 27.3 Hz, CF<sub>2</sub>), 159.0, 166.2 ppm; <sup>19</sup>F NMR (470 MHz, CDCl<sub>3</sub>) δ: -117.1- -115.3 (m, CF<sub>2</sub>), -81.2 (s, CF<sub>3</sub>) ppm; IR (KBr): ν 2954, 1745, 1604, 1490, 1338, 1273, 1225, 1192, 1107, 767cm<sup>-1</sup>; MS (DART) m/z (%): 452 [(M+H)]<sup>+</sup>. HRMS (DART) calcd. for C<sub>21</sub>H<sub>15</sub>F<sub>5</sub>N<sub>3</sub>O<sub>3</sub> [(M+H)]<sup>+</sup>: 452.1028, found: 452.1021.

**Methyl 6-(n-heptafluoropropyl)-7H-benzo[2,3]azepino[4,5-b]quinoxaline-7-carboxylate 3m**: yellow solid; m.p.: 102.6-103.7 °C; <sup>1</sup>H NMR (500 MHz, CDCl<sub>3</sub>) δ: 3.29 (s, 3H), 5.65 (s, 1H), 7.52-7.56 (m, 2H), 7.63-7.67 (m, 1H), 7.84-7.90 (m, 2H), 8.18-8.20 (m, 1H), 8.24-8.26 (m, 1H), 8.30-8.32 (m, 1H) ppm; δ: 53.0, 53.8, 109.2 (m, CF<sub>2</sub>), 111.4 (tt, <sup>1</sup>J<sub>C-F</sub> = 257.4 Hz, <sup>2</sup>J<sub>C-F</sub> = 31.0 Hz, CF<sub>2</sub>), 117.7 (qt, <sup>1</sup>J<sub>C-F</sub> = 286.3 Hz, <sup>2</sup>J<sub>C-F</sub> = 33.4 Hz, CF<sub>3</sub>), 127.3, 127.8, 128.2,

129.1, 129.6, 130.7, 130.9, 131.0, 131.1, 142.1, 142.6, 142.9, 147.8, 148.1, 151.5 (t,  $^2J_{C-F} = 26.0$  Hz, CF<sub>2</sub>), 165.8 ppm; <sup>19</sup>F NMR (470 MHz, CDCl<sub>3</sub>) δ: -125.1 (s, CF<sub>2</sub>), -114.4 (s, CF<sub>2</sub>), -79.9 (s, CF<sub>3</sub>) ppm; IR (KBr): ν 2950, 1755, 1632, 1484, 1444, 1331, 1222, 1190, 1118, 769 cm<sup>-1</sup>; MS (DART) m/z (%): 472 [(M+H)]<sup>+</sup>. HRMS (DART) calcd. for C<sub>21</sub>H<sub>13</sub>F<sub>7</sub>N<sub>3</sub>O<sub>2</sub> [(M+H)]<sup>+</sup>: 472.0891, found: 472.0883.

**Methyl 6-(n-heptafluoropropyl)-2-methoxy-7H-benzo[2,3]azepino[4,5-b]quinoxaline-7-carboxylate 3n**: yellow solid; m.p.: 93.4-95.2 °C; <sup>1</sup>H NMR (500 MHz, CDCl<sub>3</sub>) δ: 3.35 (s, 3H), 3.97 (s, 3H), 5.64 (s, 1H), 7.19-7.21 (m, 1H), 7.50-7.51 (m, 1H), 7.79-7.80 (m, 1H), 7.83-7.89 (m, 2H), 8.18-8.20 (m, 1H), 8.24-8.25 (m, 1H) ppm; <sup>13</sup>C NMR (125 MHz, CDCl<sub>3</sub>) δ: 53.1, 53.7, 55.7, 109.2 (m, CF<sub>2</sub>), 111.5 (tt,  $^1J_{C-F} = 256.9$  Hz,  $^2J_{C-F} = 31.1$  Hz, CF<sub>2</sub>), 114.0, 117.7 (qt,  $^1J_{C-F} = 286.3$  Hz,  $^2J_{C-F} = 33.4$  Hz, CF<sub>3</sub>), 118.4, 129.1, 129.4, 129.6, 129.7, 130.7, 130.9, 136.7, 142.4, 142.5, 147.5, 147.9, 149.1 (t,  $^2J_{C-F} = 26.0$  Hz, CF<sub>2</sub>), 159.1, 166.1 ppm; <sup>19</sup>F NMR (470 MHz, CDCl<sub>3</sub>) δ: -125.2 (s, CF<sub>2</sub>), -114.2 (s, CF<sub>2</sub>), -79.9 (s, CF<sub>3</sub>) ppm; IR (KBr): ν 2947, 1740, 1606, 1489, 1435, 1329, 1267, 1230, 1118, 757 cm<sup>-1</sup>; MS (DART) m/z (%): 502 [(M+H)]<sup>+</sup>. HRMS (DART) calcd. for C<sub>22</sub>H<sub>15</sub>F<sub>7</sub>N<sub>3</sub>O<sub>3</sub> [(M+H)]<sup>+</sup>: 502.0996, found: 502.0985.

#### References:

12. B. Jan, E. Robert, S. Claes and W. Hans, *Tetrahedron*, 2003, **59**, 1033.
13. F. Iveta and S. Jan, *Acta Universitatis Palackianae Olomucensis, Facultas Rerum Naturalium, Chemica.*, 2003, **42**, 61.

## 5. NMR spectra of products

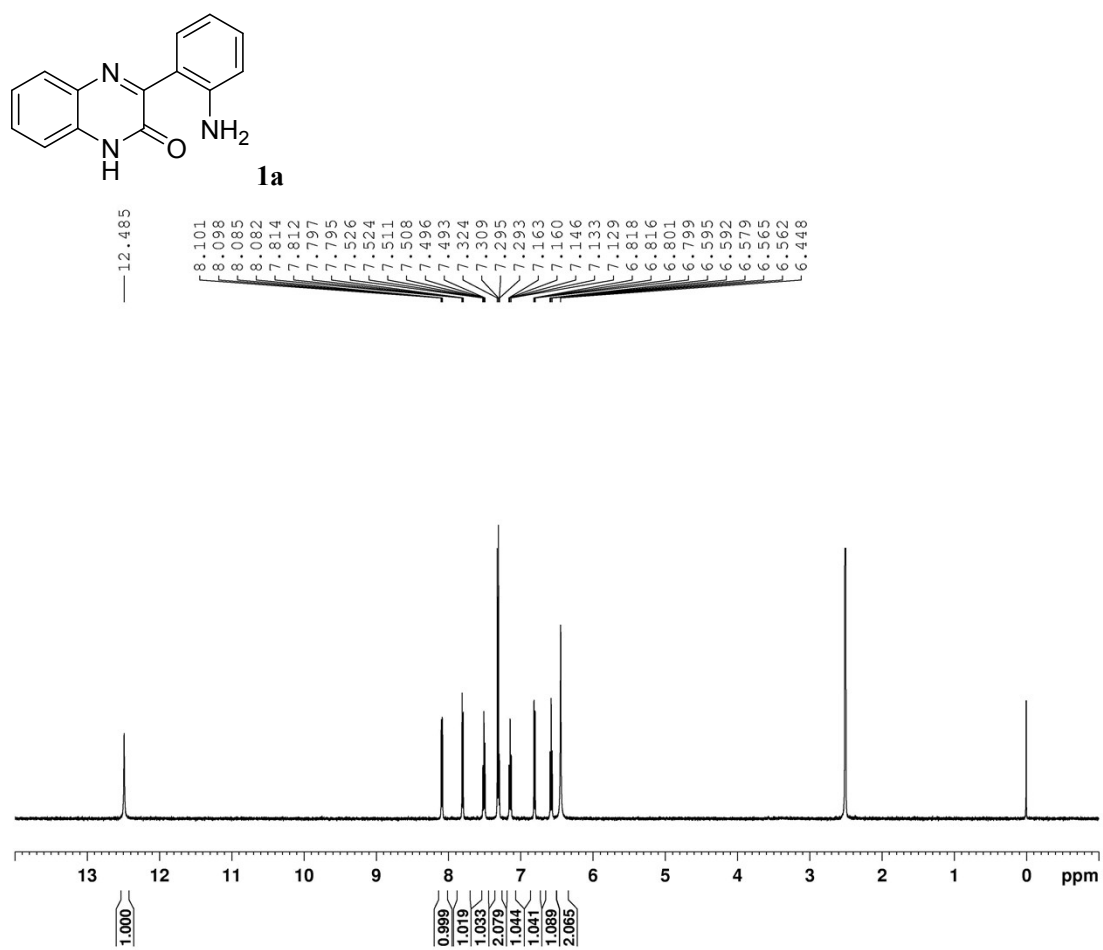

Fig S1. <sup>1</sup>H NMR of **1a** in DMSO-*d*<sub>6</sub>



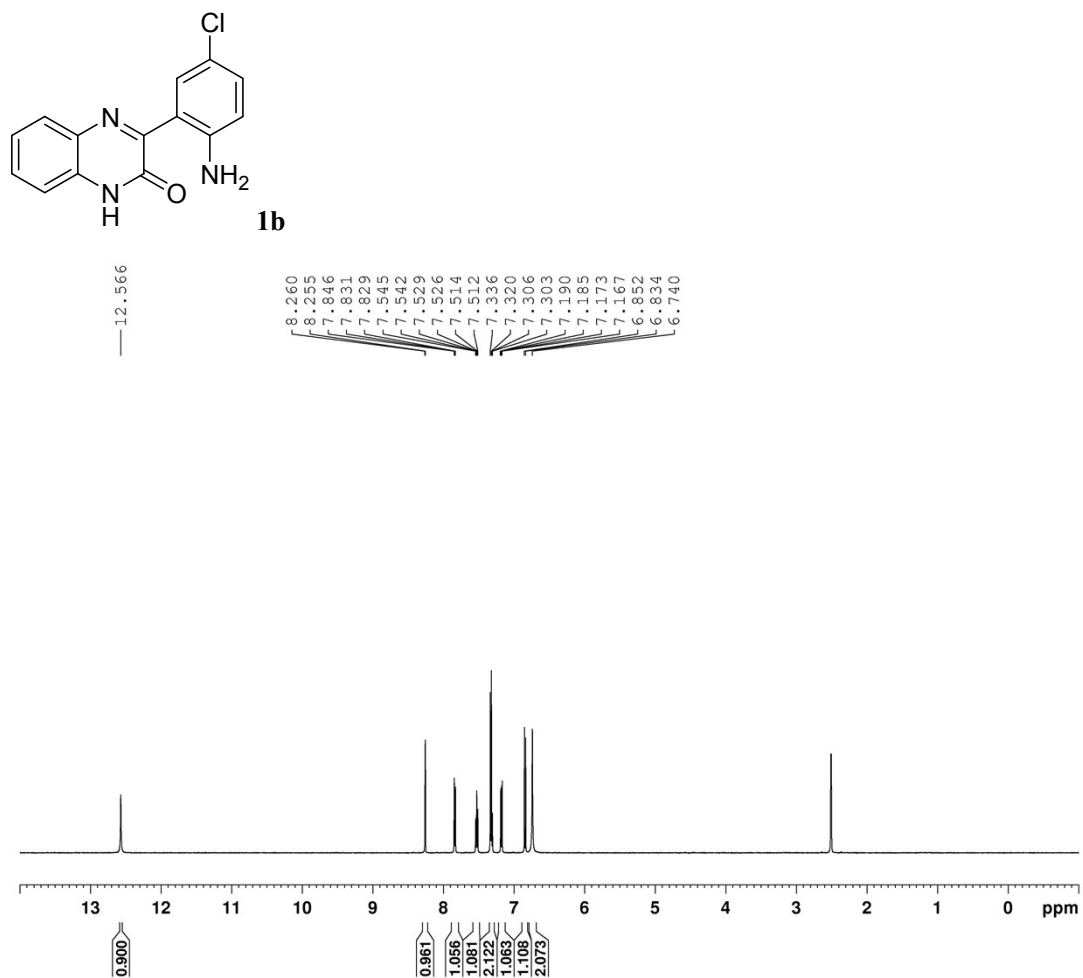

Fig S2. <sup>1</sup>H NMR of **1b** in DMSO-*d*<sub>6</sub>

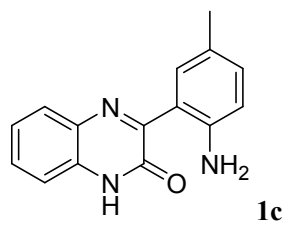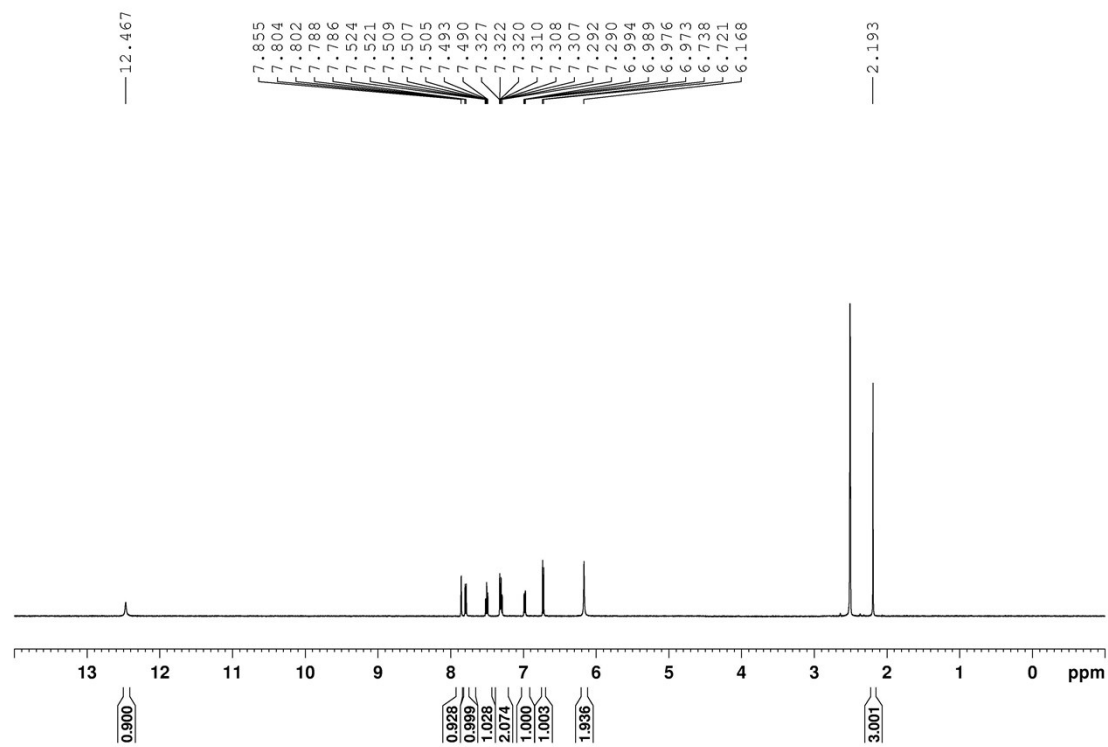

**Fig S3.**  $^1\text{H}$  NMR of **1c** in  $\text{DMSO-}d_6$

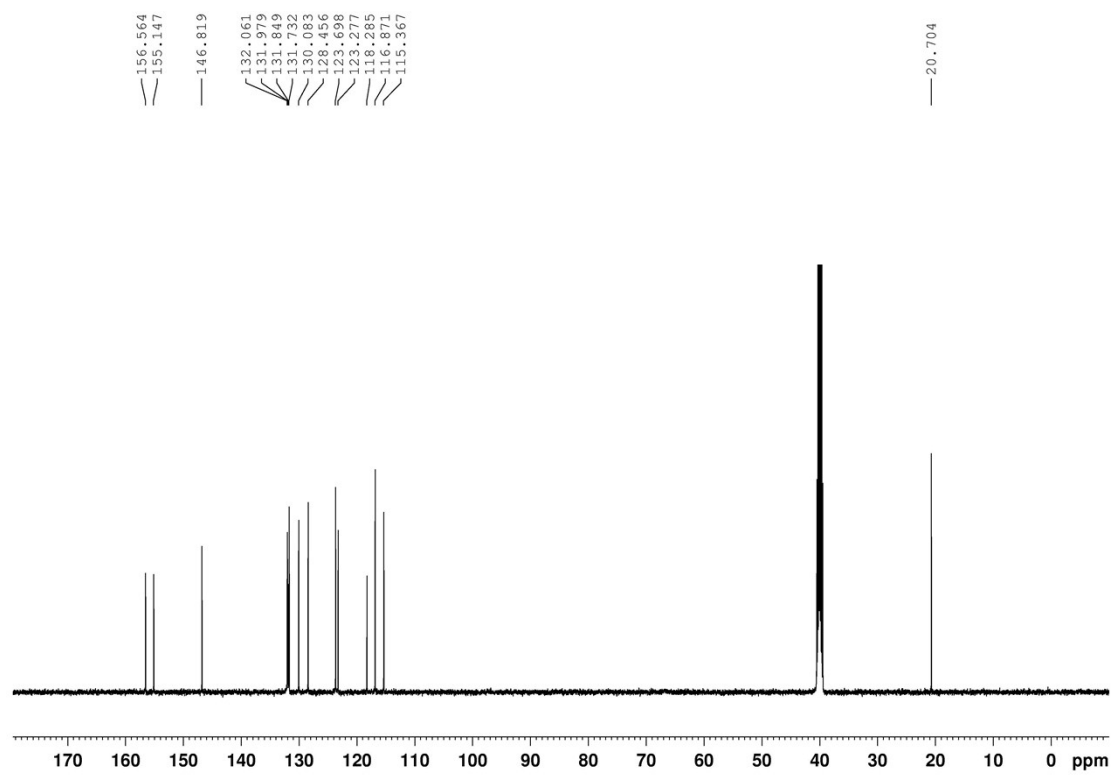

**Fig S4.**  $^{13}\text{C}$  NMR of **1c** in  $\text{DMSO-}d_6$

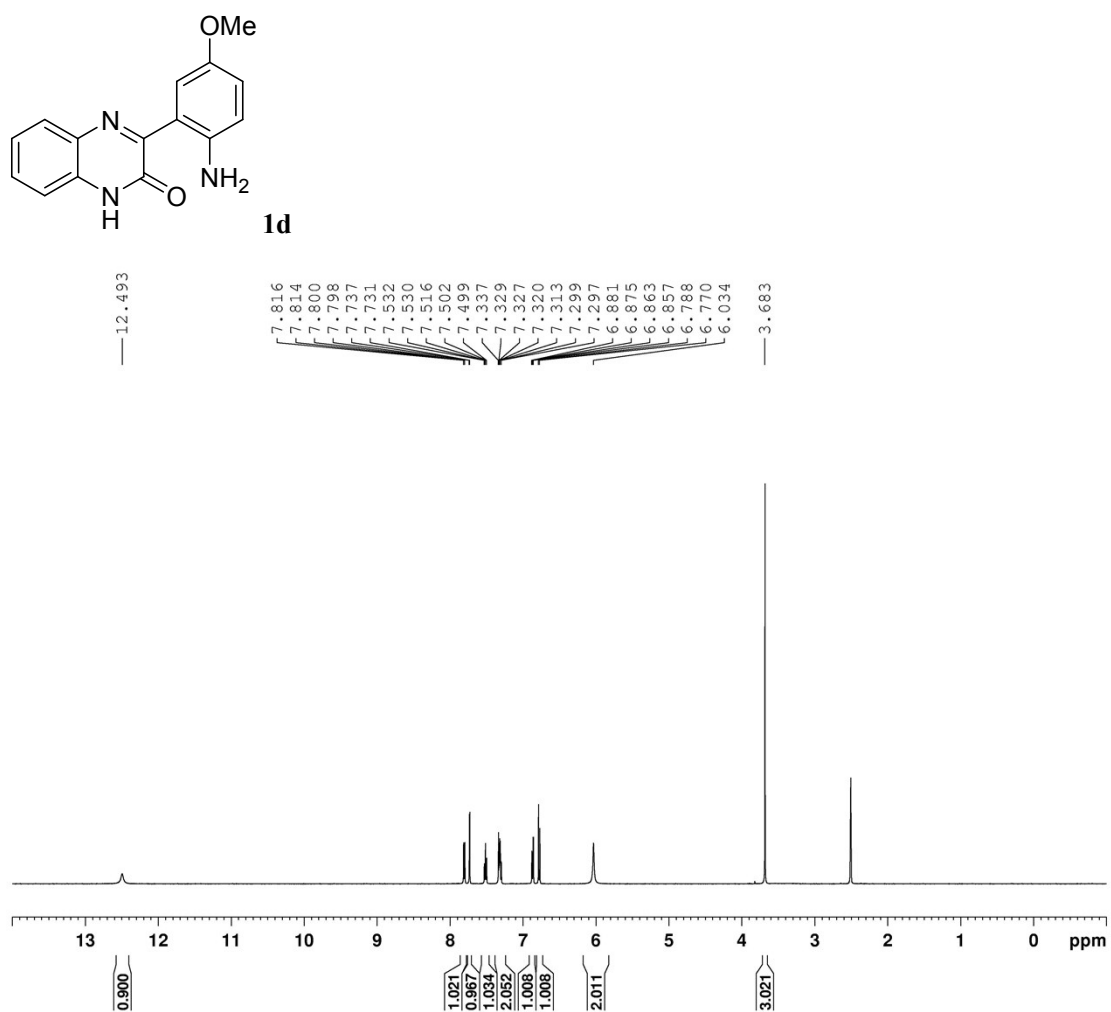

**Fig S5.** <sup>1</sup>H NMR of **1d** in DMSO-*d*<sub>6</sub>

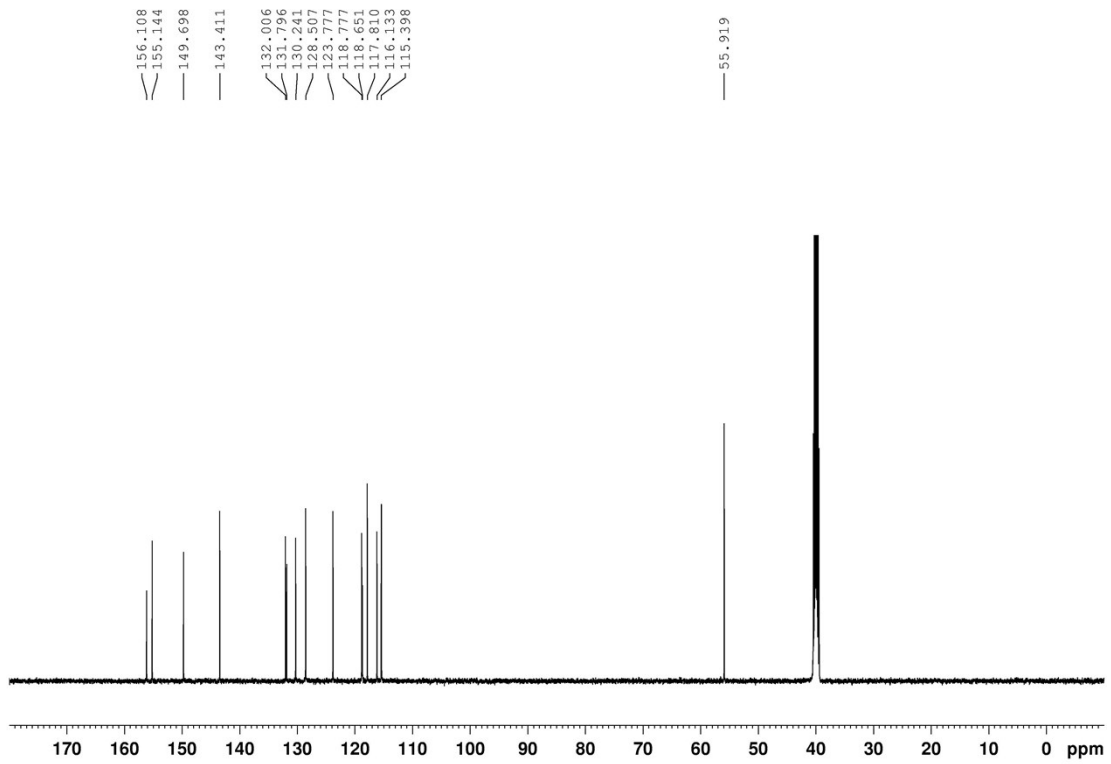

**Fig S6.**  $^{13}\text{C}$ NMR of **1d** in  $\text{DMSO-}d_6$

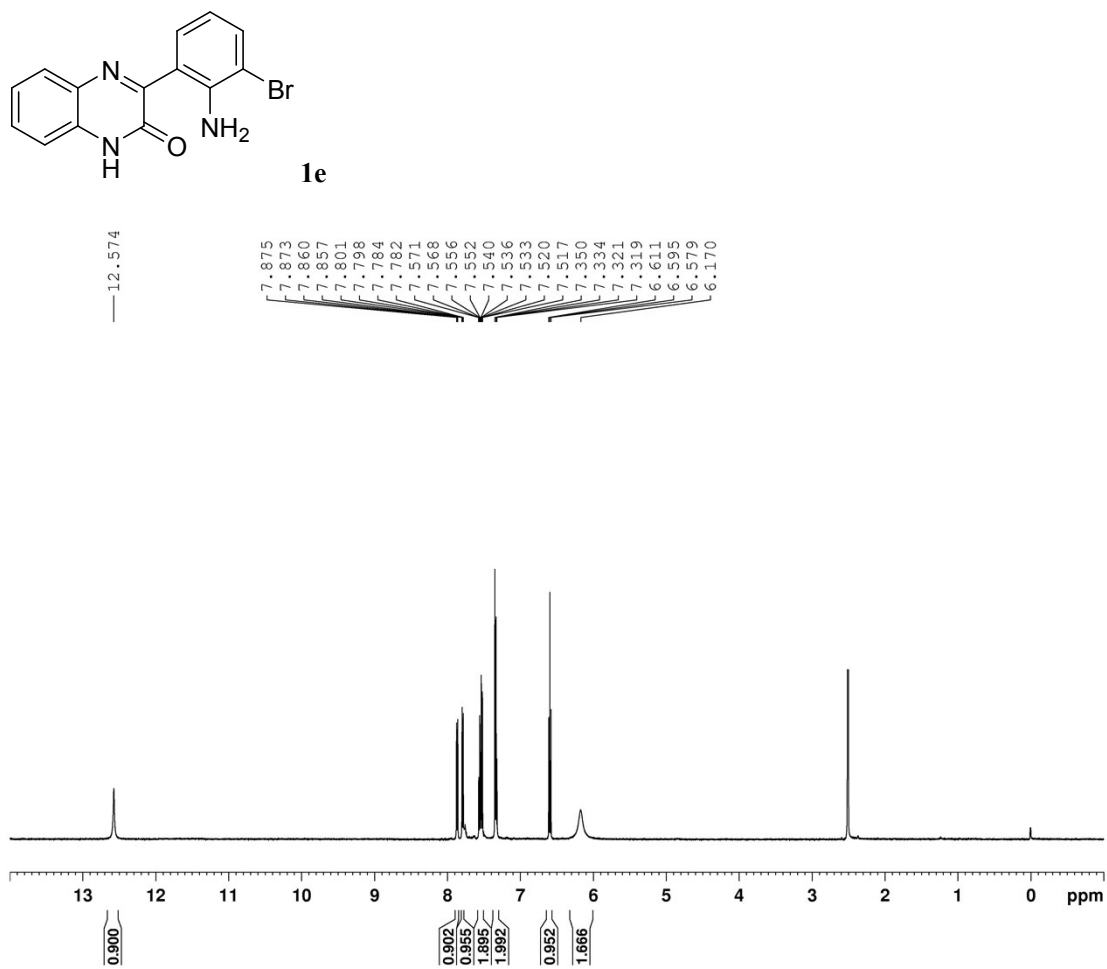

Fig S7. <sup>1</sup>H NMR of **1e** in DMSO-*d*<sub>6</sub>

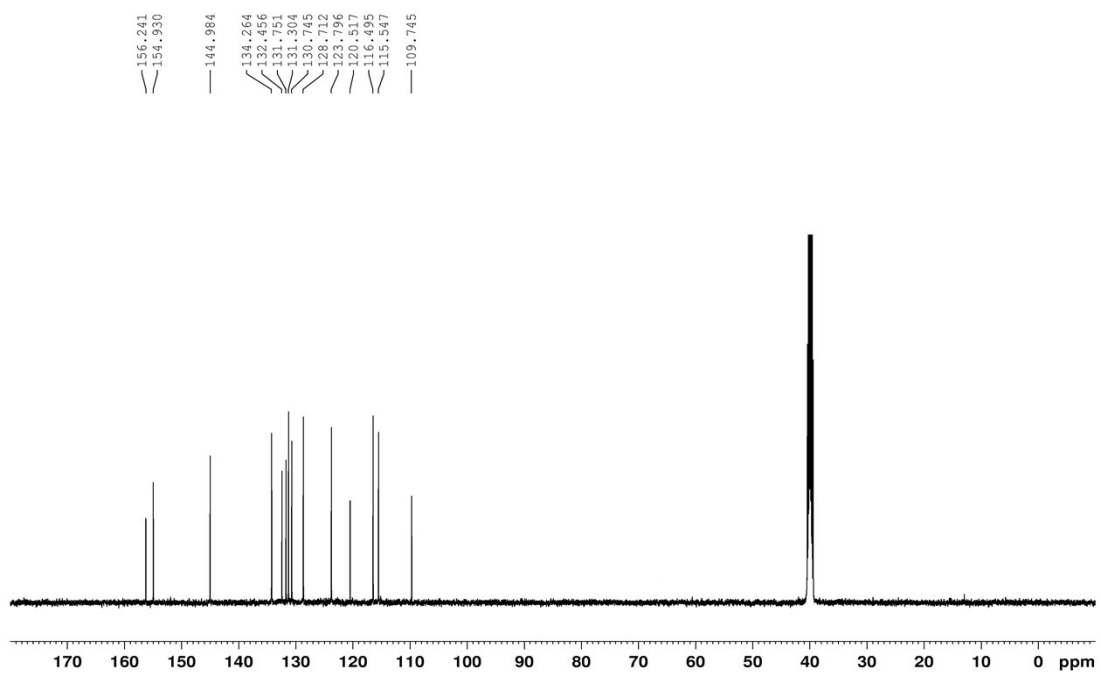

Fig S8. <sup>13</sup>C NMR of **1e** in DMSO-*d*<sub>6</sub>

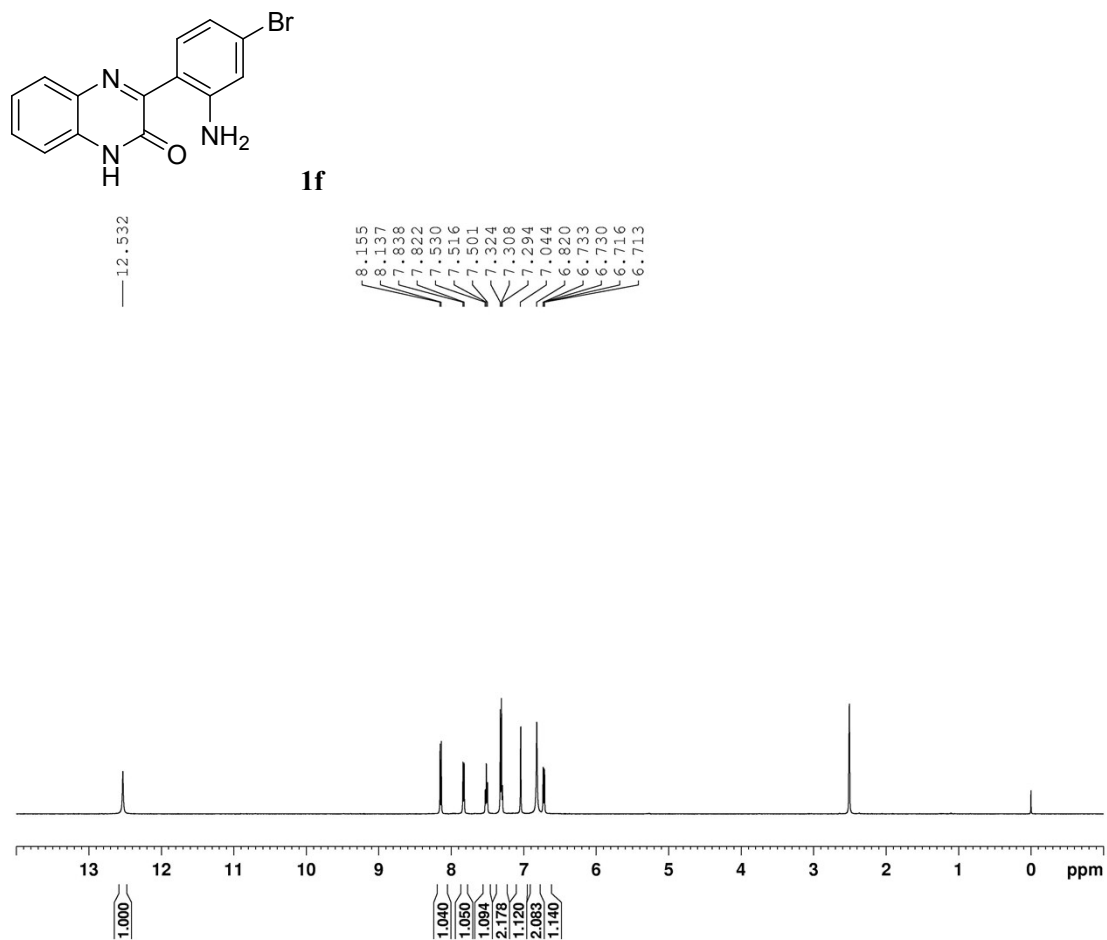

Fig S9.  $^1\text{H}$  NMR of **1f** in  $\text{DMSO-}d_6$

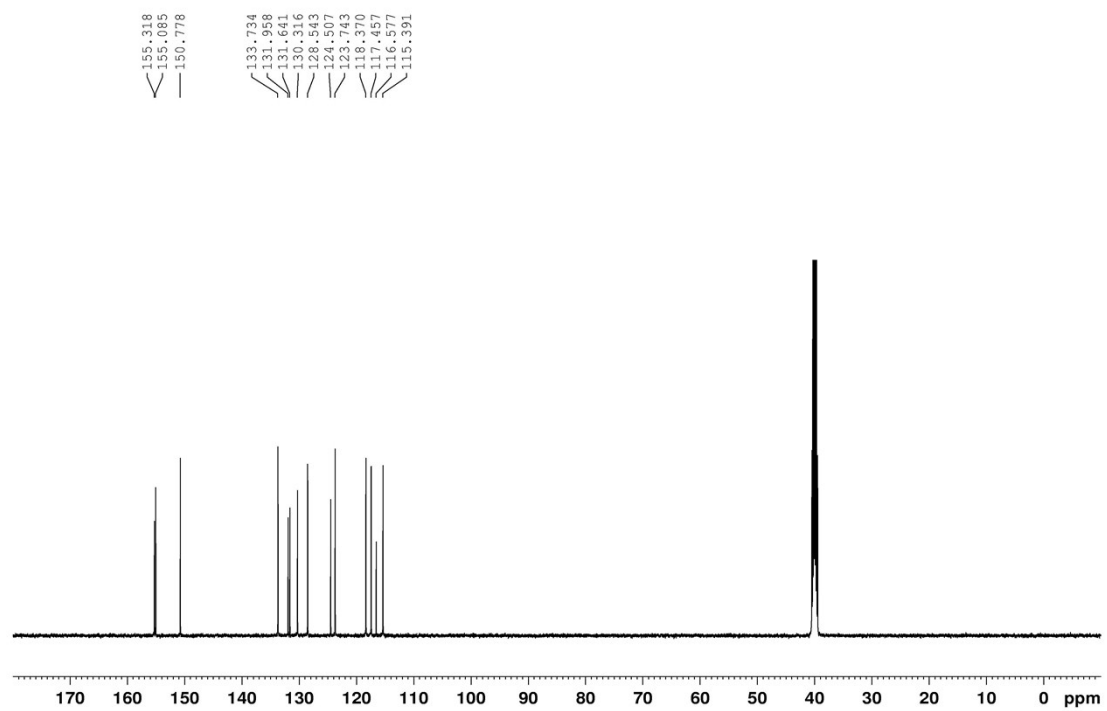

Fig S10.  $^{13}\text{C}$  NMR of **1f** in  $\text{DMSO-}d_6$

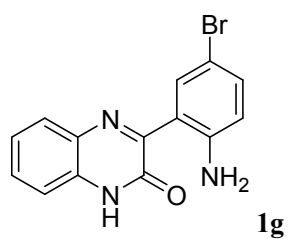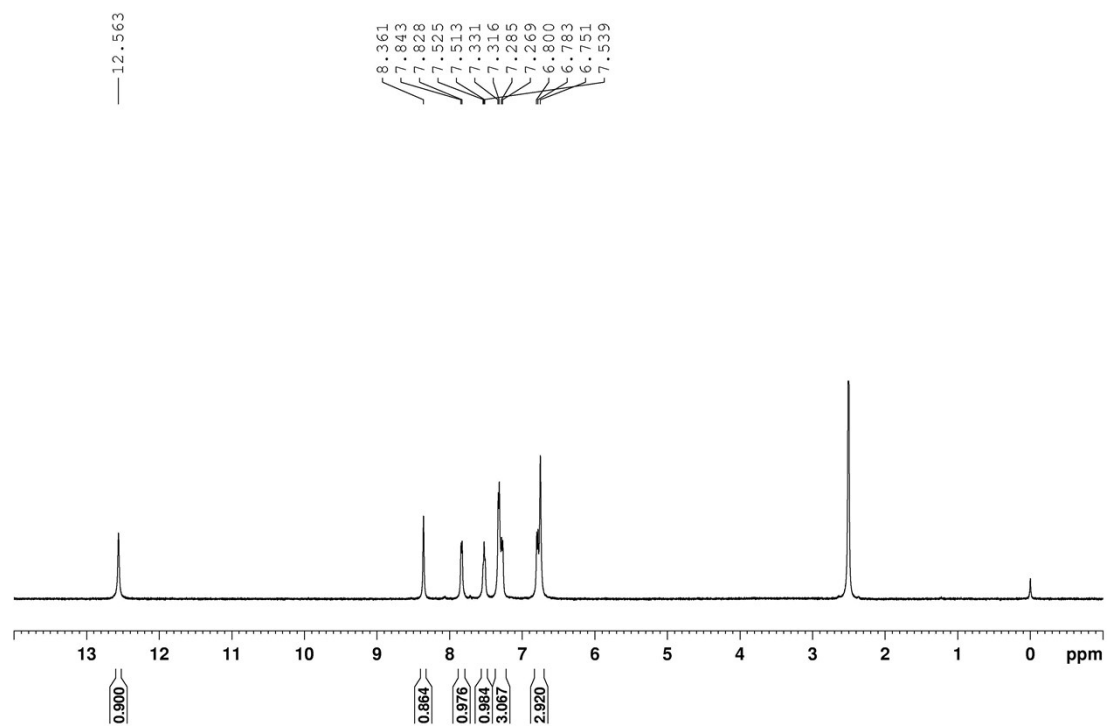

Fig S11.  $^1\text{H}$  NMR of **1g** in  $\text{DMSO-}d_6$



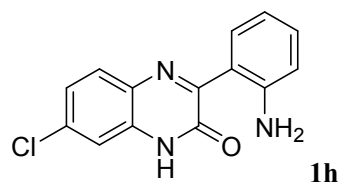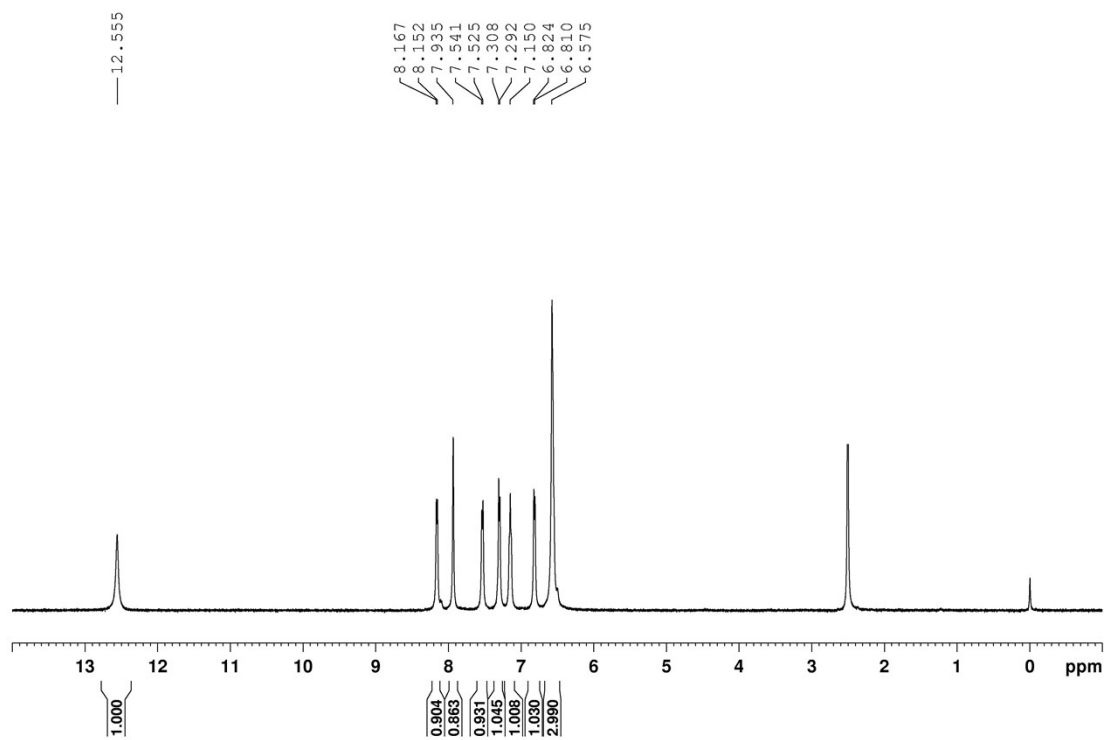

Fig S12. <sup>1</sup>H NMR of **1h** in DMSO-*d*<sub>6</sub>

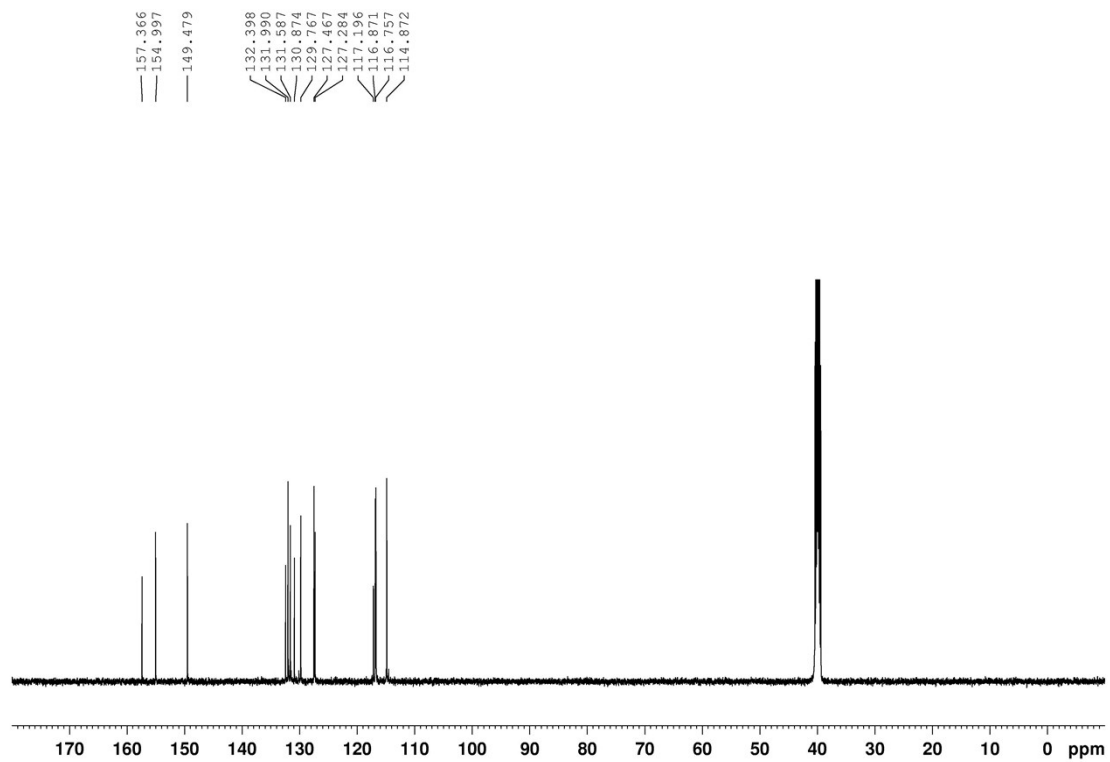

**Fig S13.**  $^{13}\text{C}$  NMR of **1h** in  $\text{DMSO-}d_6$

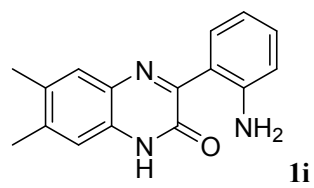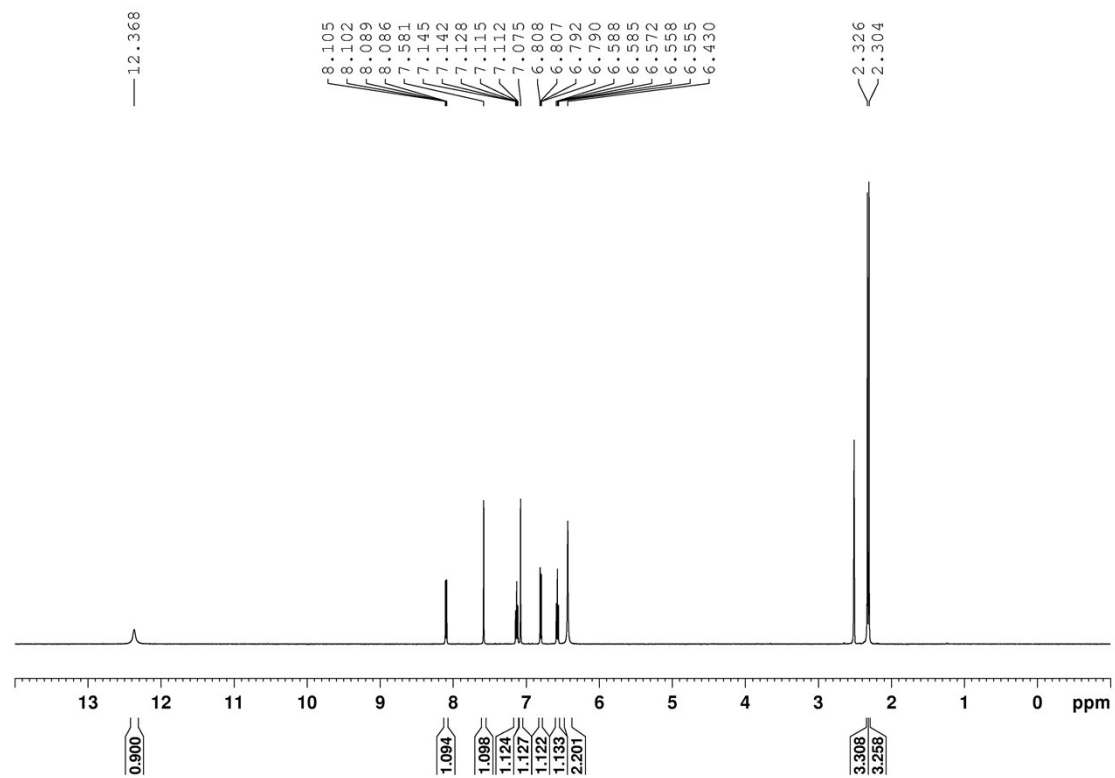

Fig S14. <sup>1</sup>H NMR of **1i** in DMSO-*d*<sub>6</sub>

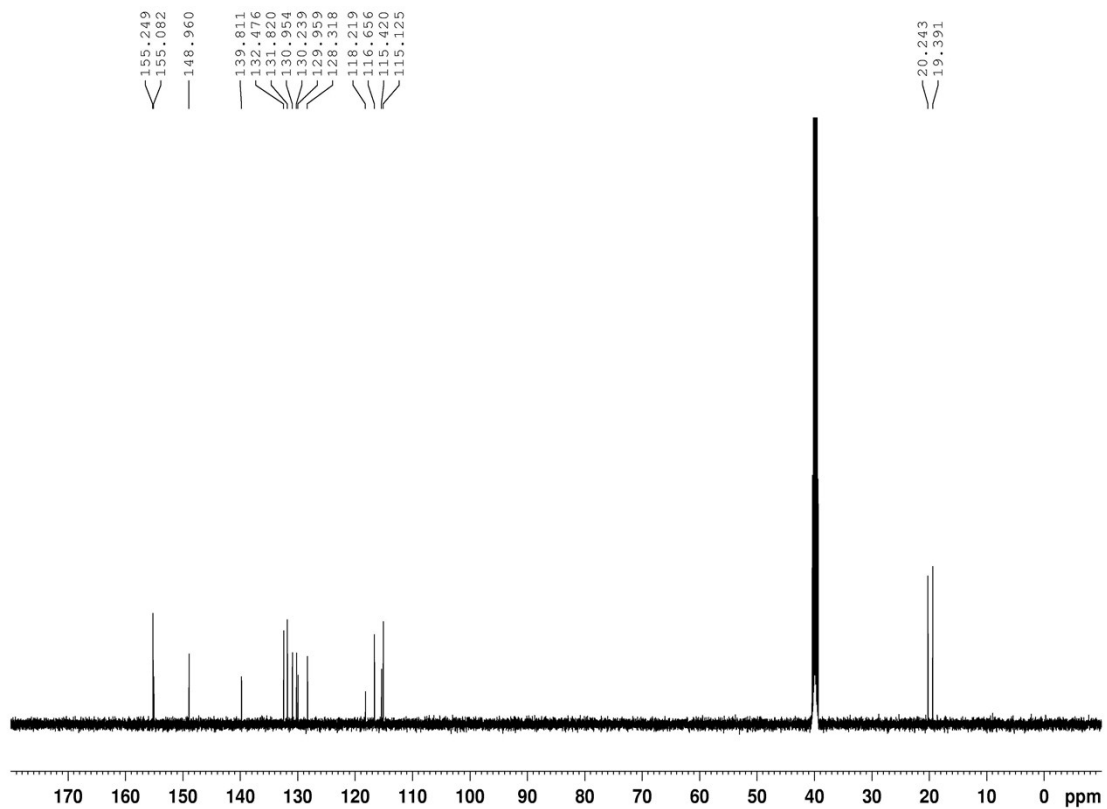

**Fig S15.**  $^{13}\text{C}$  NMR of **1i** in  $\text{DMSO-}d_6$

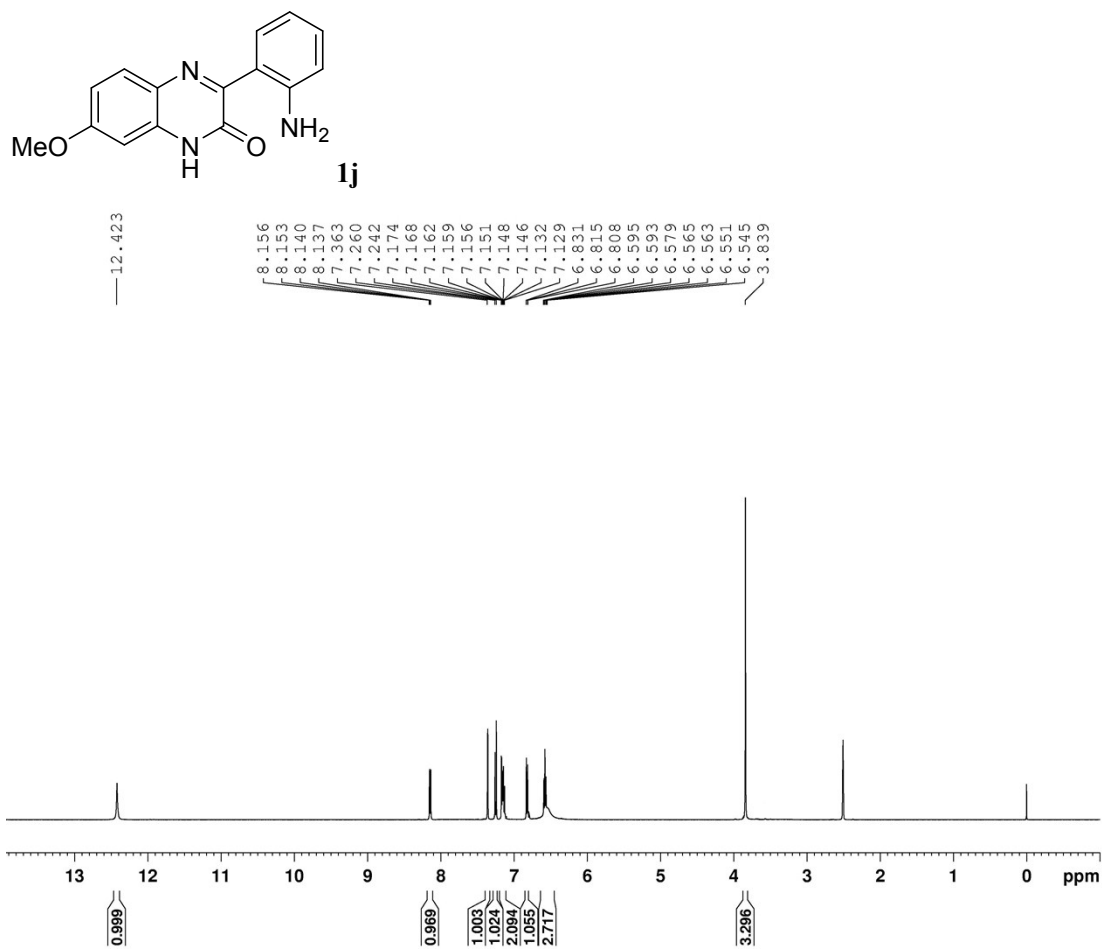

Fig S16. <sup>1</sup>H NMR of **1j** in DMSO-*d*<sub>6</sub>

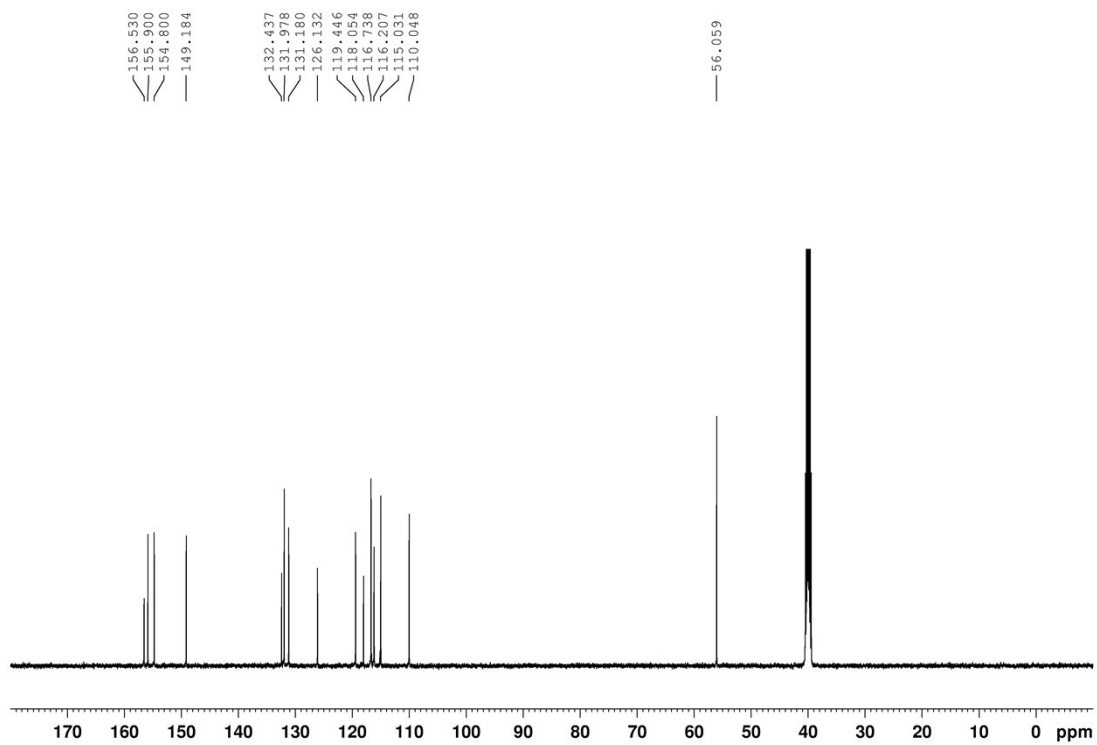

Fig S17. <sup>13</sup>C NMR of **1j** in DMSO-*d*<sub>6</sub>

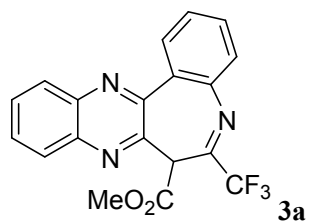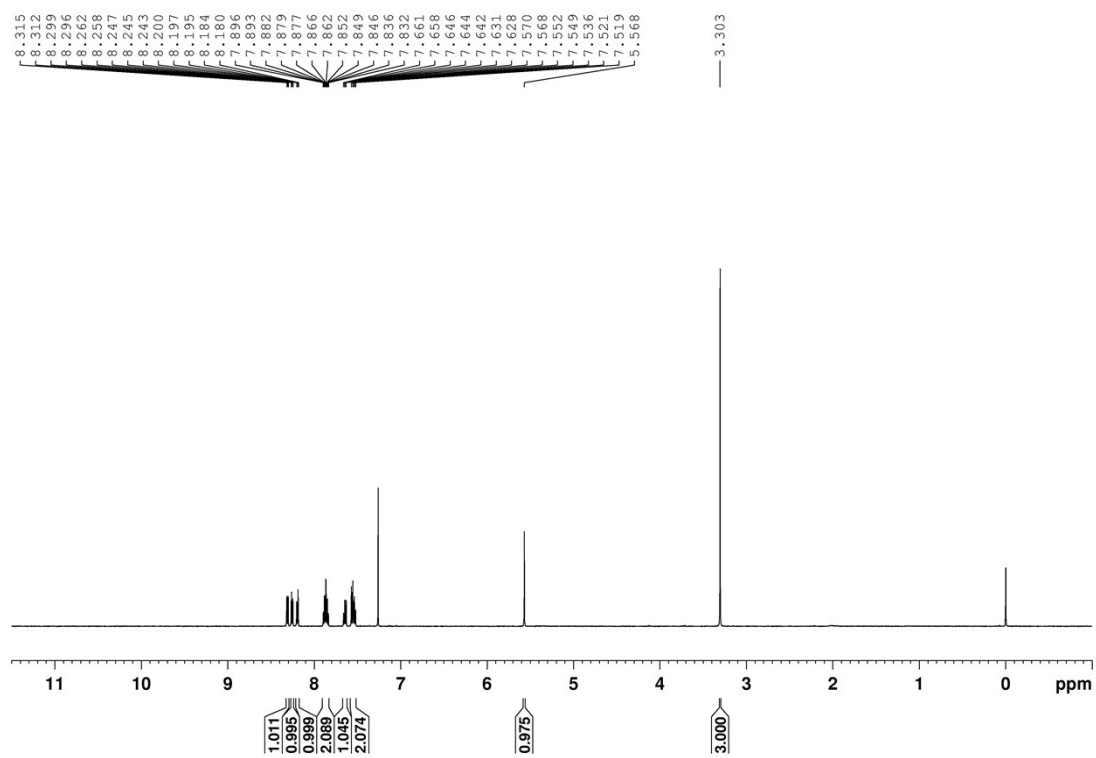

**Fig S18.**  $^1\text{H}$  NMR of **3a** in  $\text{CDCl}_3$

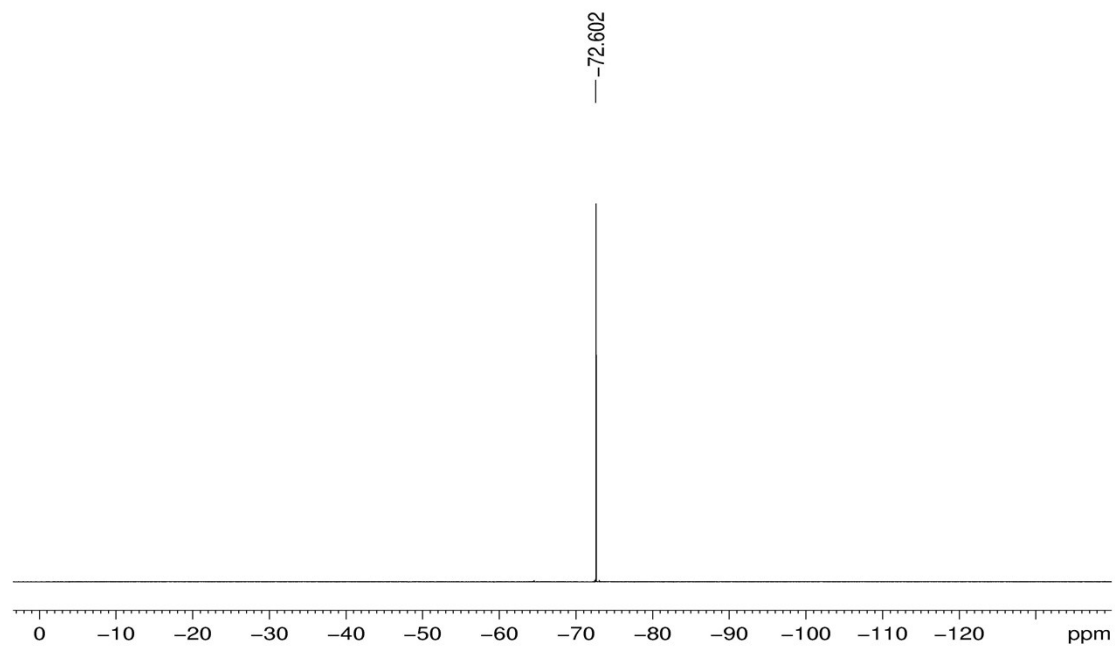

**Fig S19.**  $^{19}\text{F}$  NMR of **3a** in  $\text{CDCl}_3$

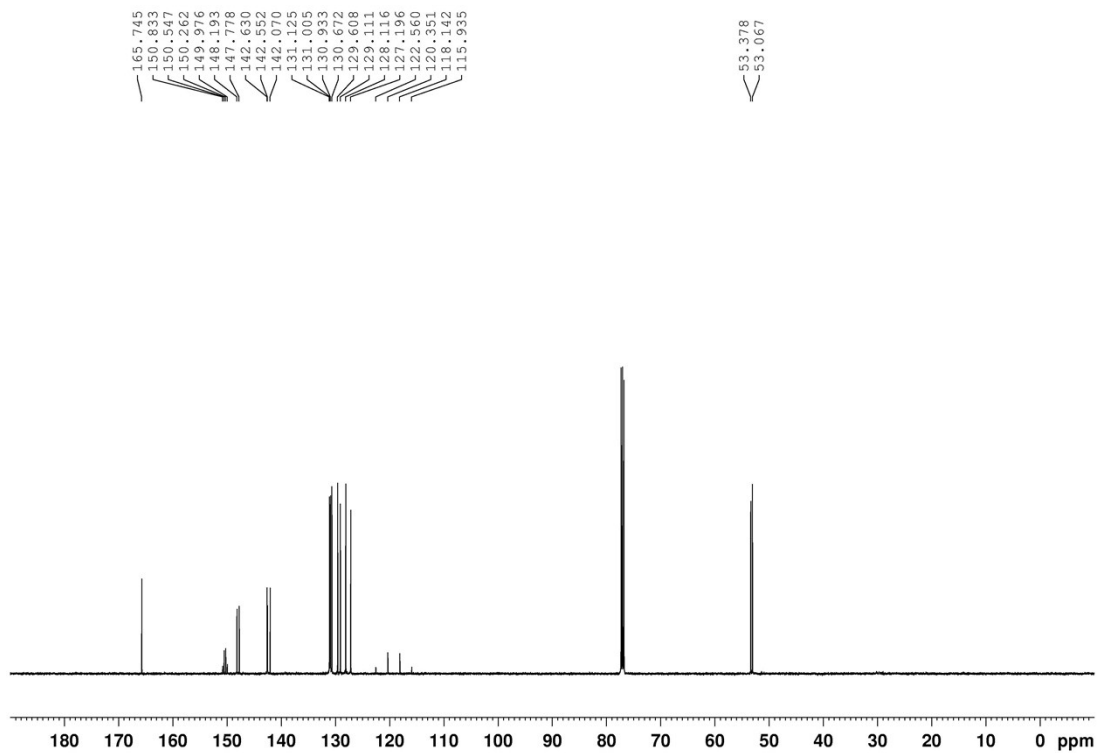

**Fig S20.**  $^{13}\text{C}$  NMR of **3a** in  $\text{CDCl}_3$

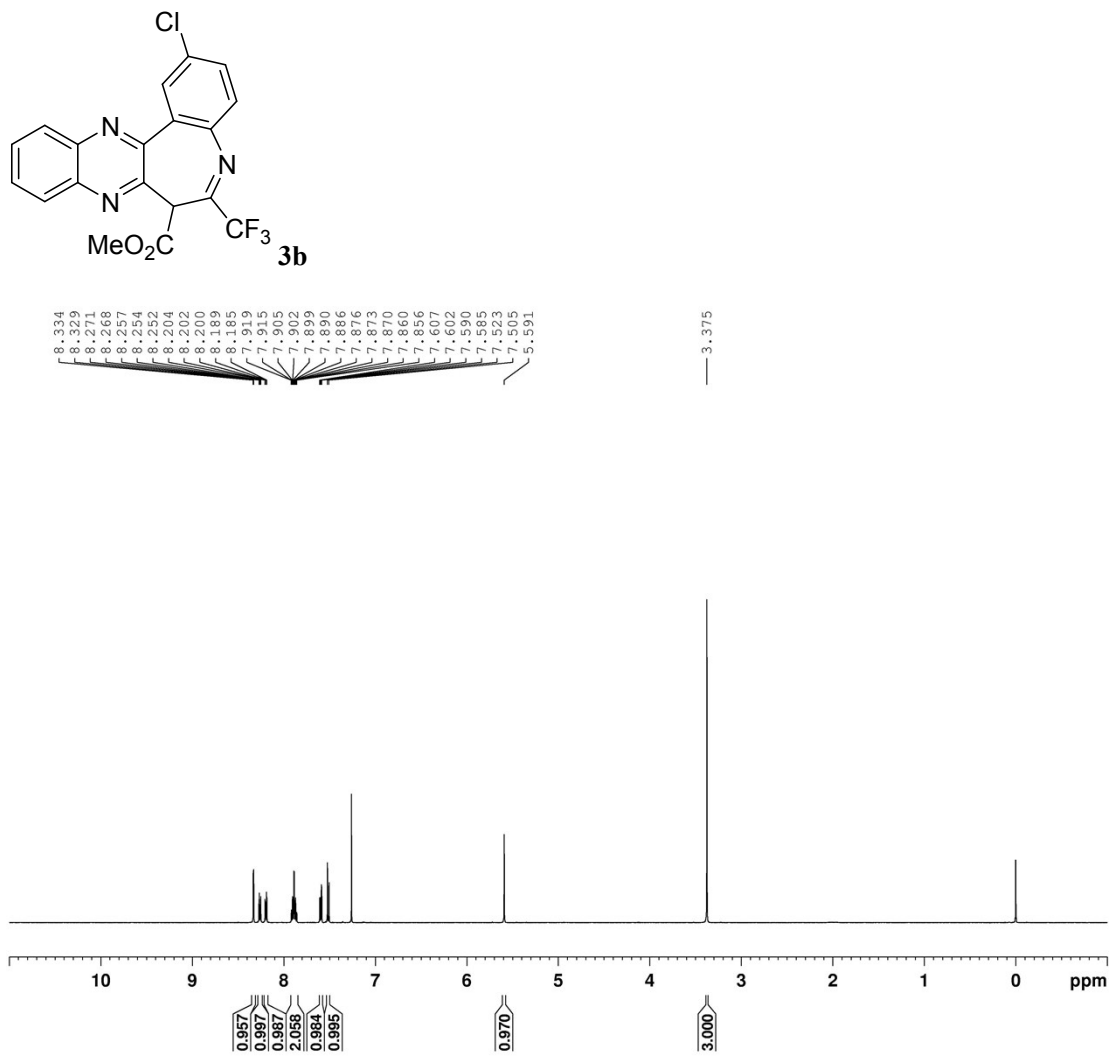

Fig S21. <sup>1</sup>H NMR of **3b** in CDCl<sub>3</sub>



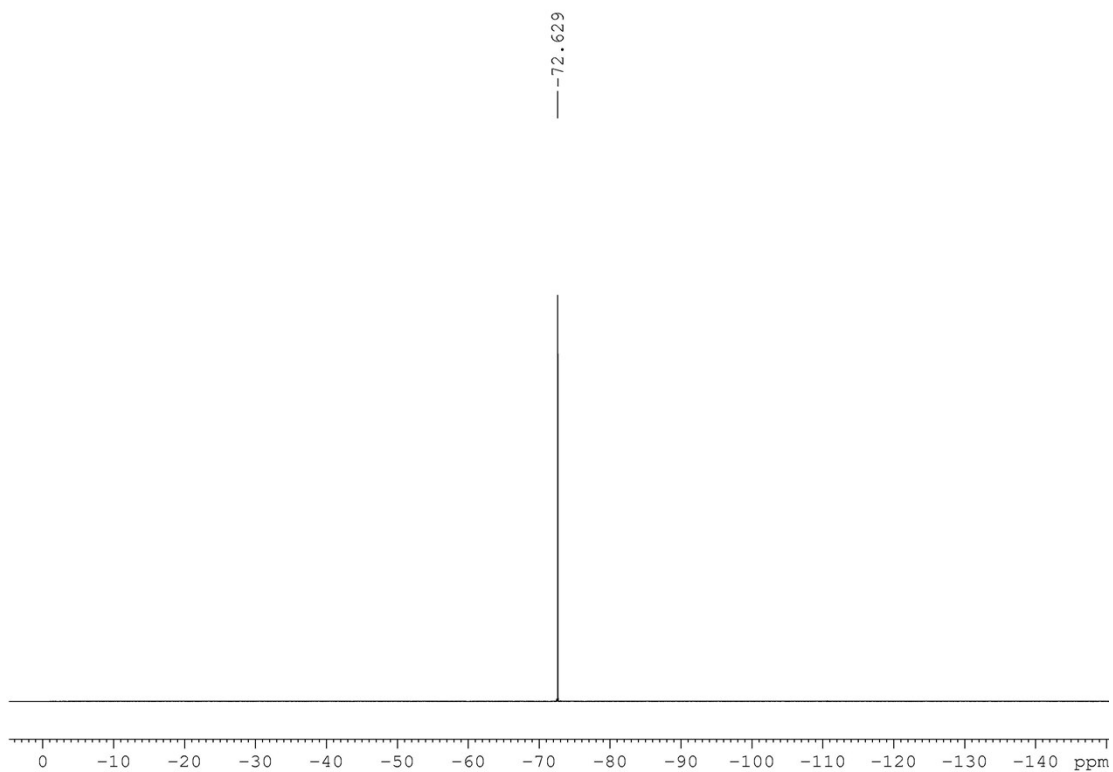

Fig S22.  $^{19}\text{F}$  NMR of **3b** in  $\text{CDCl}_3$

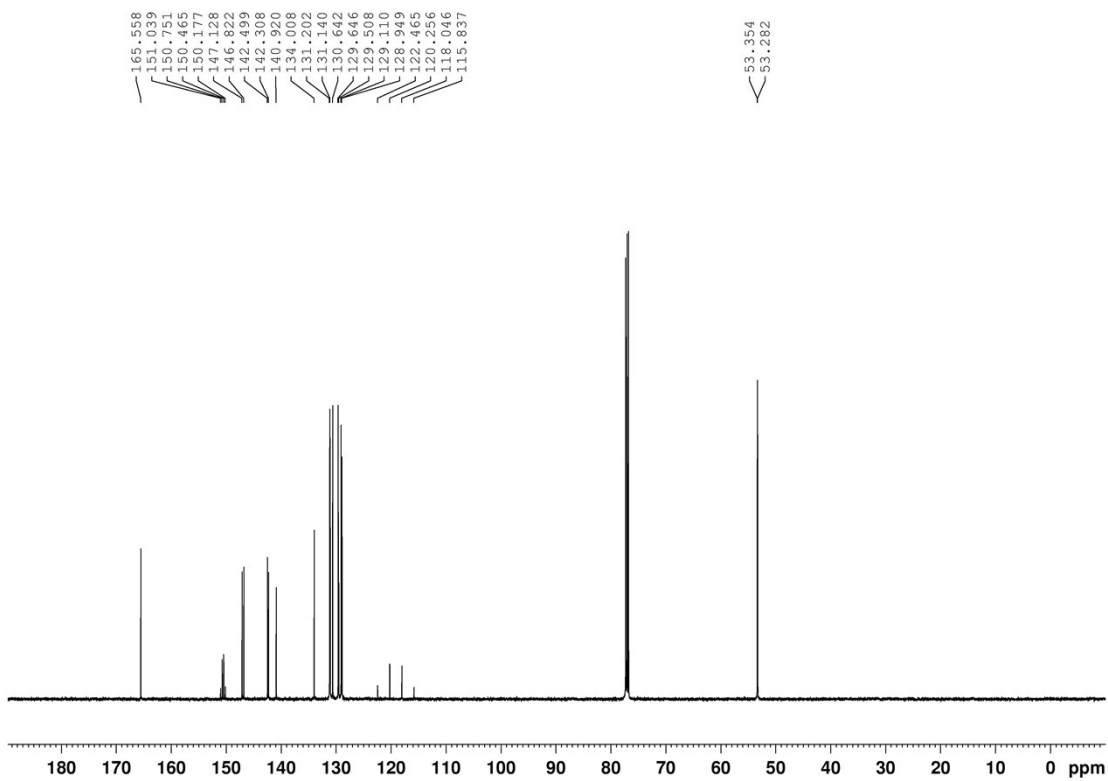

Fig S23.  $^{13}\text{C}$  NMR of **3b** in  $\text{CDCl}_3$

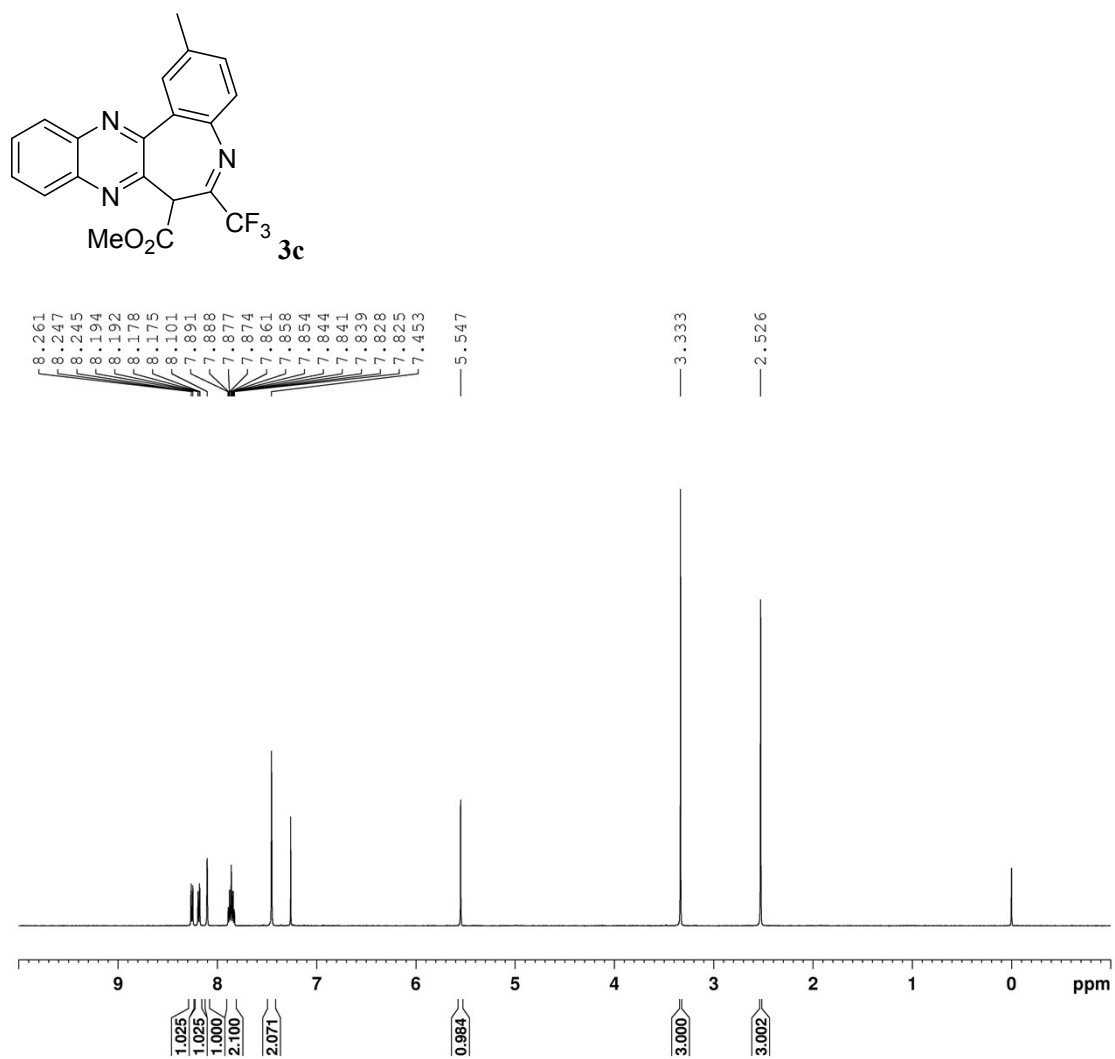

Fig S24.  $^1\text{H NMR}$  of **3c** in  $\text{CDCl}_3$

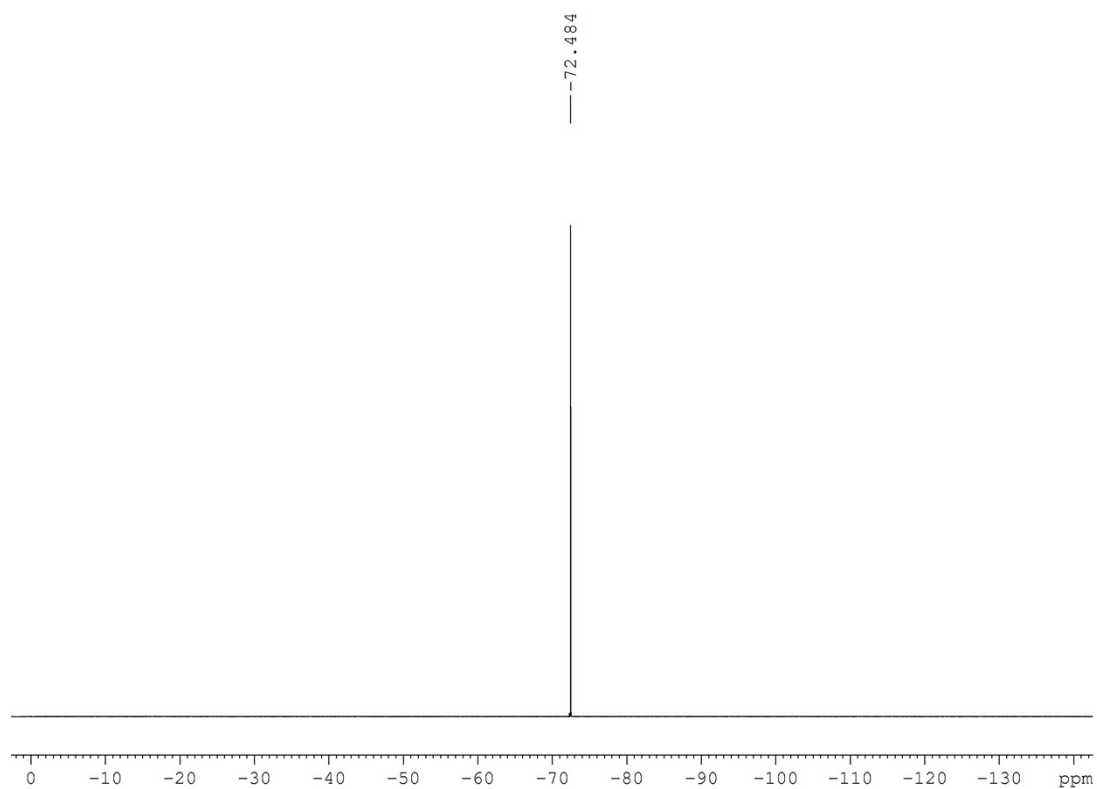

Fig S25.  $^{19}\text{F}$  NMR of **3c** in  $\text{CDCl}_3$

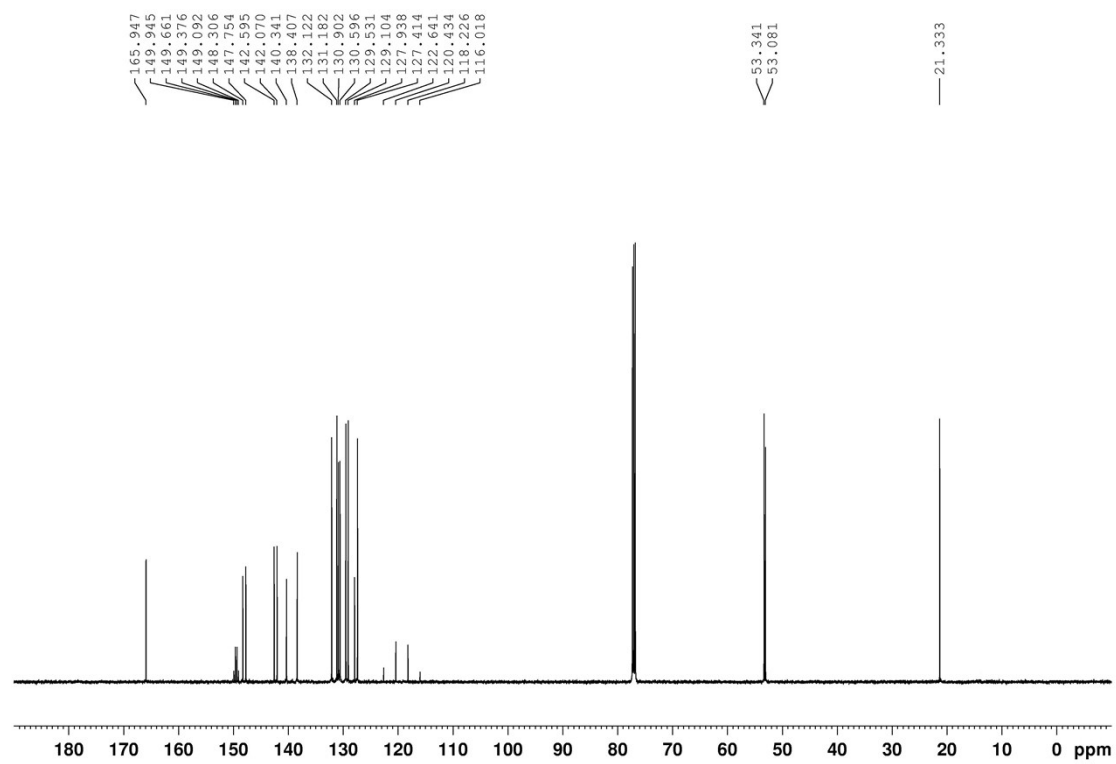

Fig S26.  $^{13}\text{C}$  NMR of **3c** in  $\text{CDCl}_3$

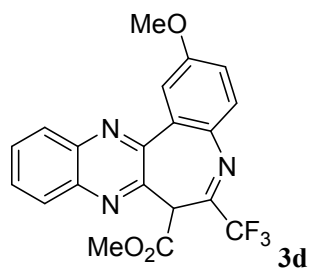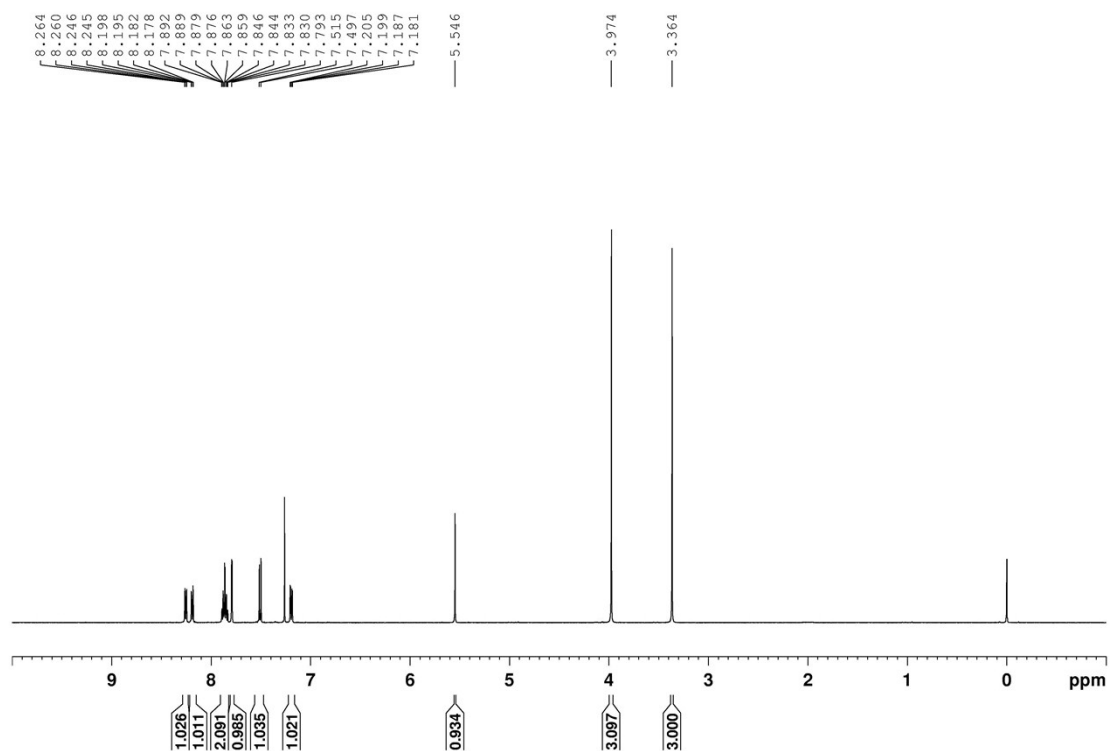

**Fig S27.**  $^1\text{H}$  NMR of **3d** in  $\text{CDCl}_3$

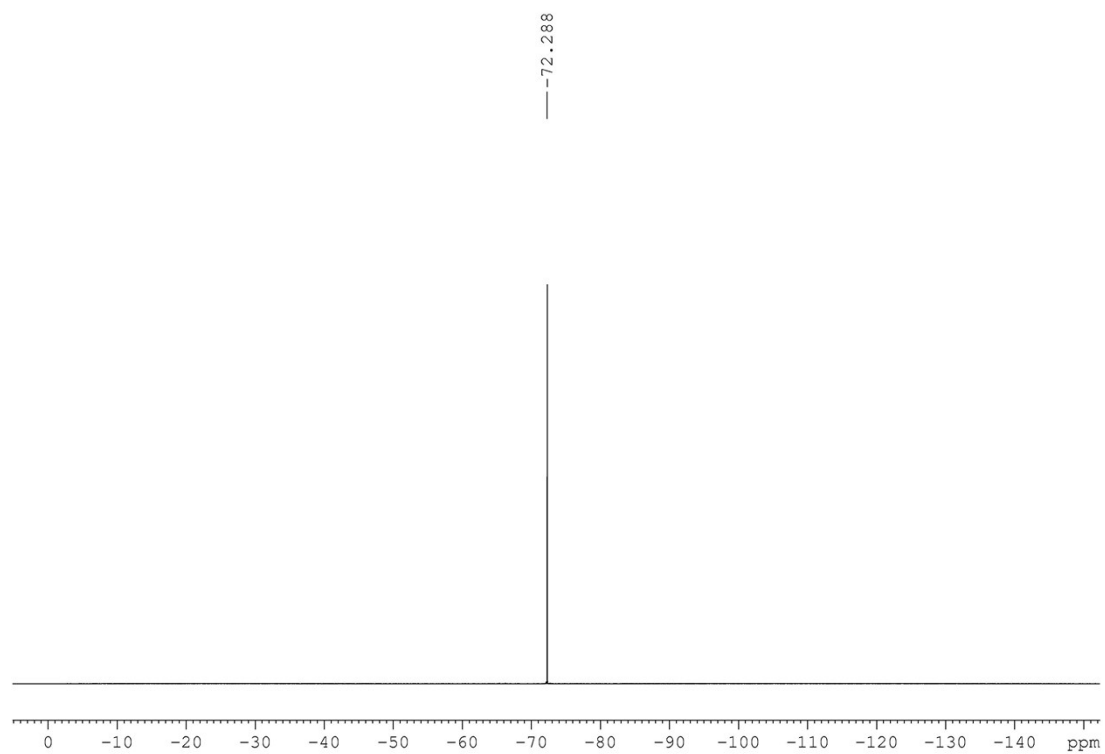

Fig S28.  $^{19}\text{F}$  NMR of **3d** in  $\text{CDCl}_3$

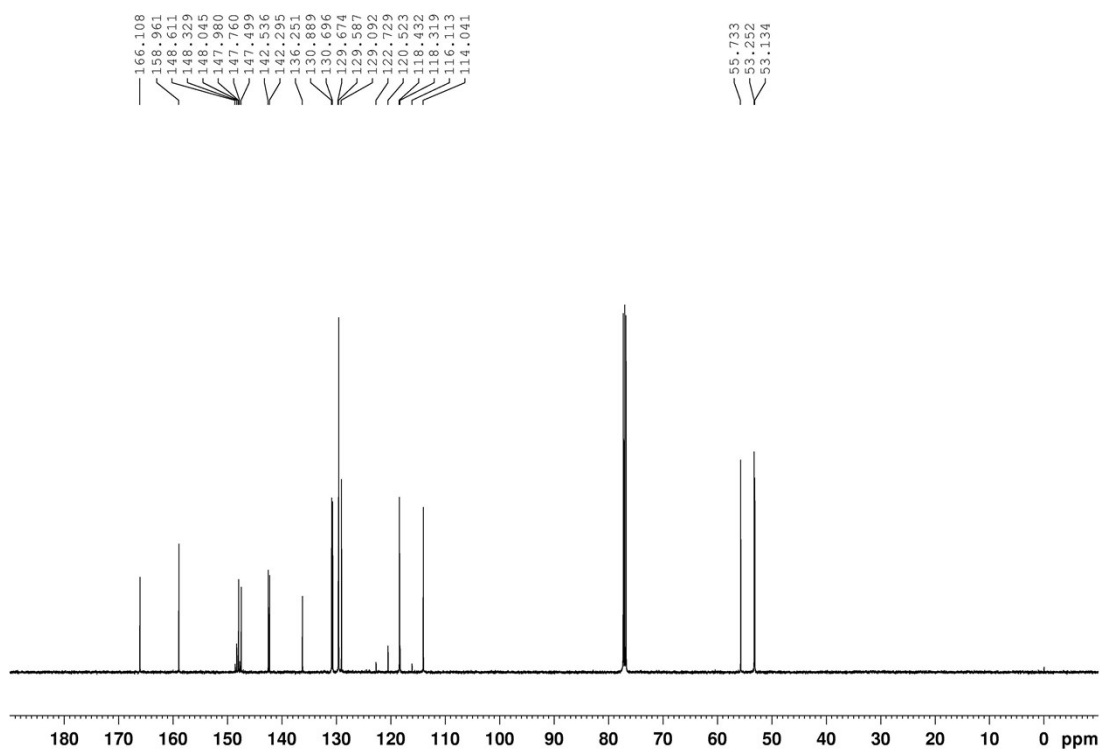

Fig S29.  $^{13}\text{C}$  NMR of **3d** in  $\text{CDCl}_3$

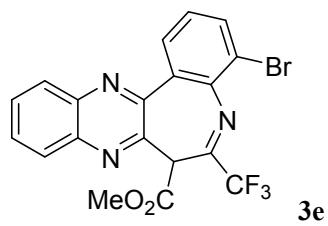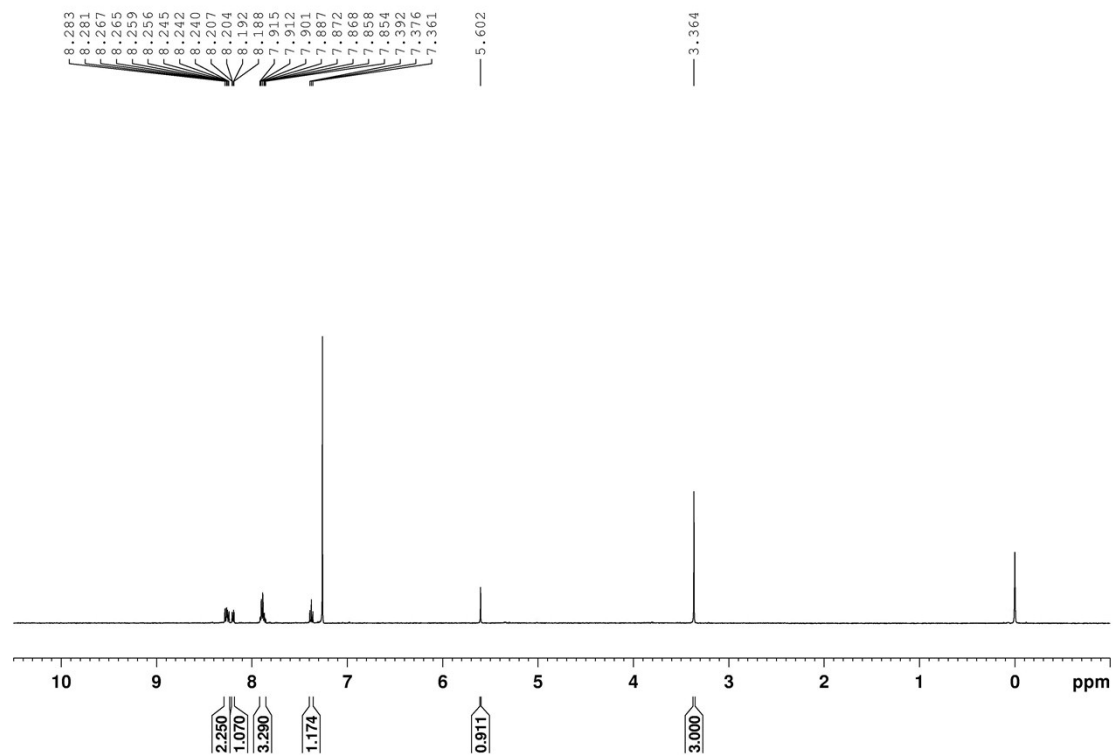

**Fig S30.**  $^1\text{H}$  NMR of **3e** in  $\text{CDCl}_3$

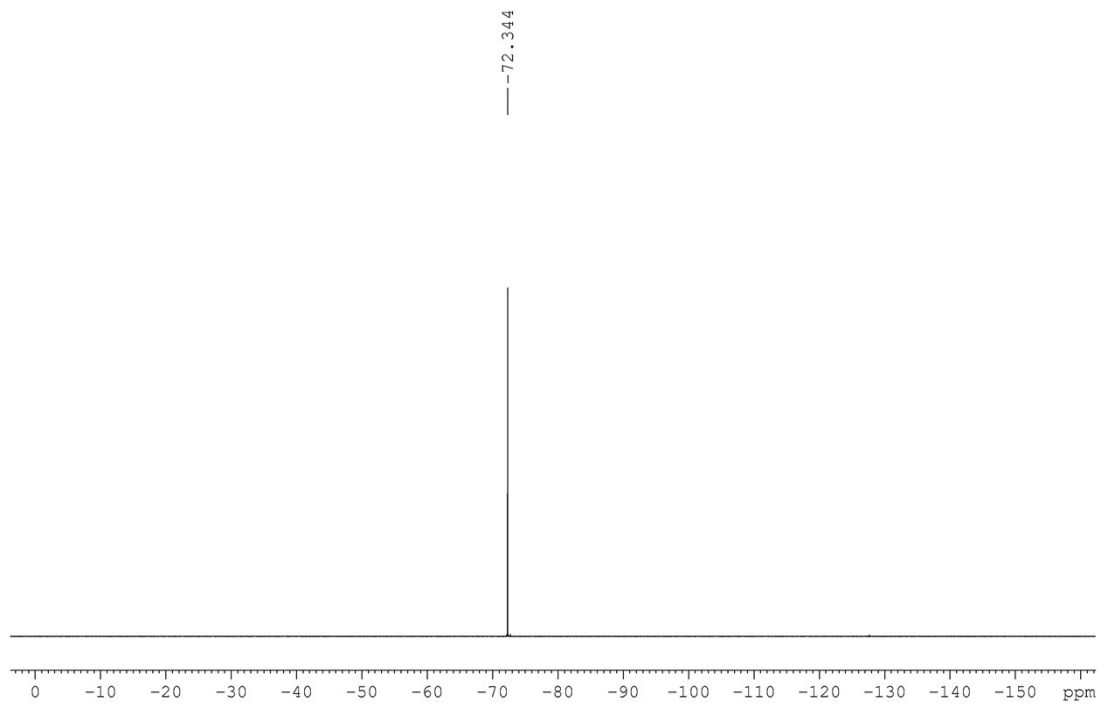

Fig S31.  $^{19}\text{F}$  NMR of **3e** in  $\text{CDCl}_3$

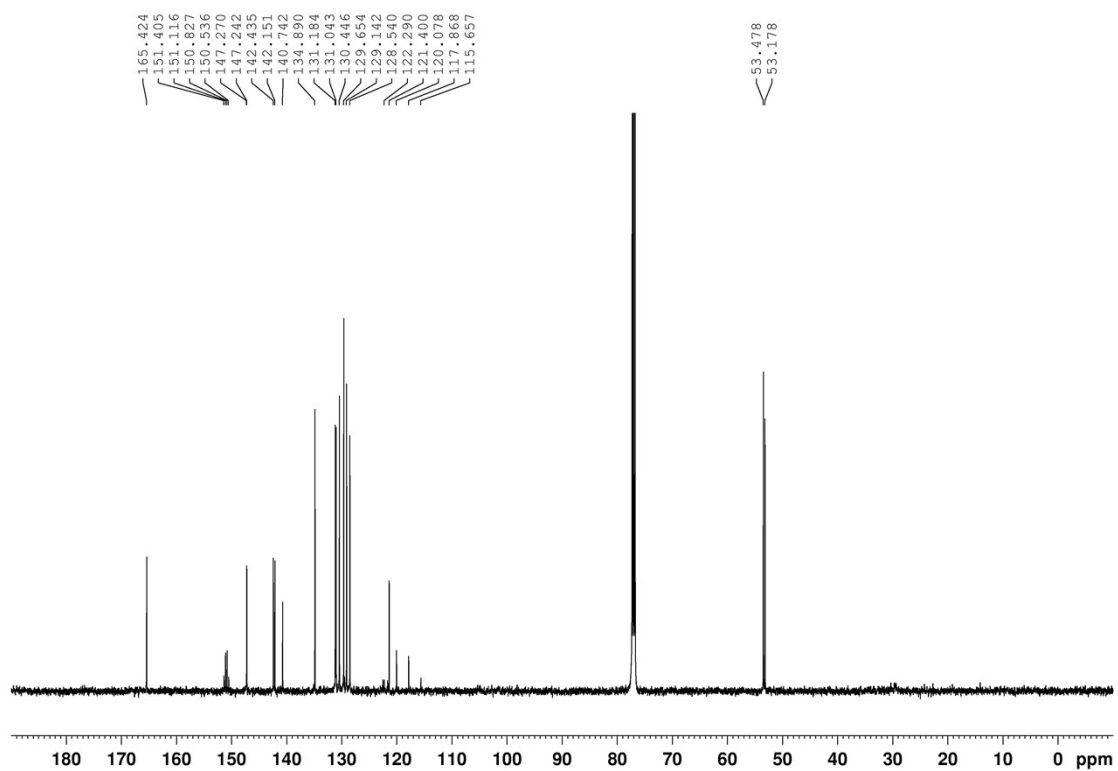

Fig S32.  $^{13}\text{C}$  NMR of **3e** in  $\text{CDCl}_3$

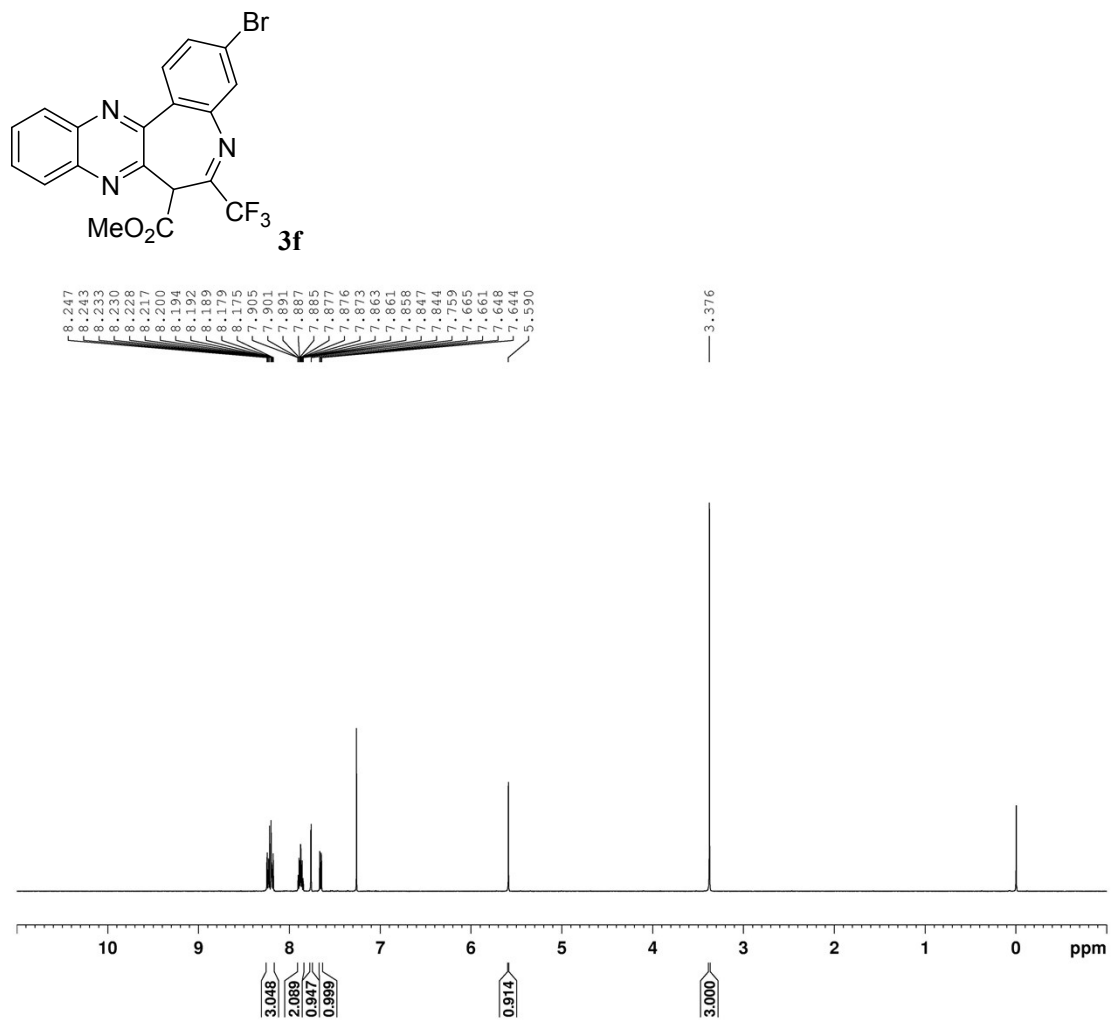

Fig S33. <sup>1</sup>H NMR of **3f** in CDCl<sub>3</sub>



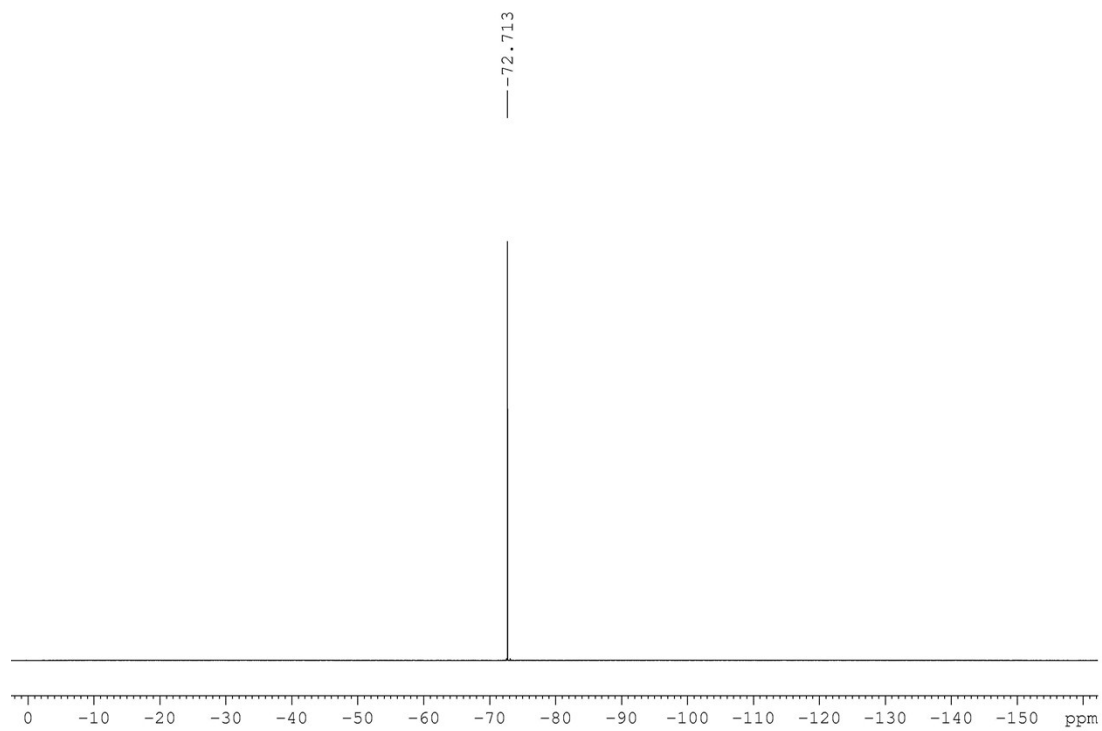

Fig S34.  $^{19}\text{F}$  NMR of **3f** in  $\text{CDCl}_3$

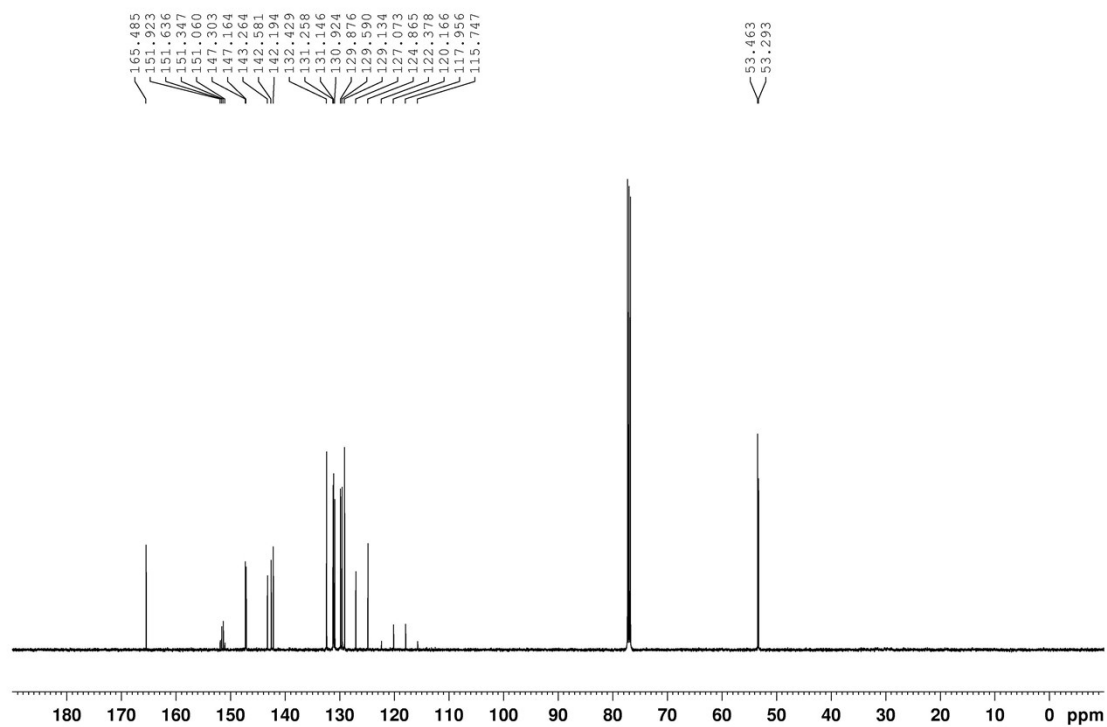

Fig S35.  $^{13}\text{C}$  NMR of **3f** in  $\text{CDCl}_3$

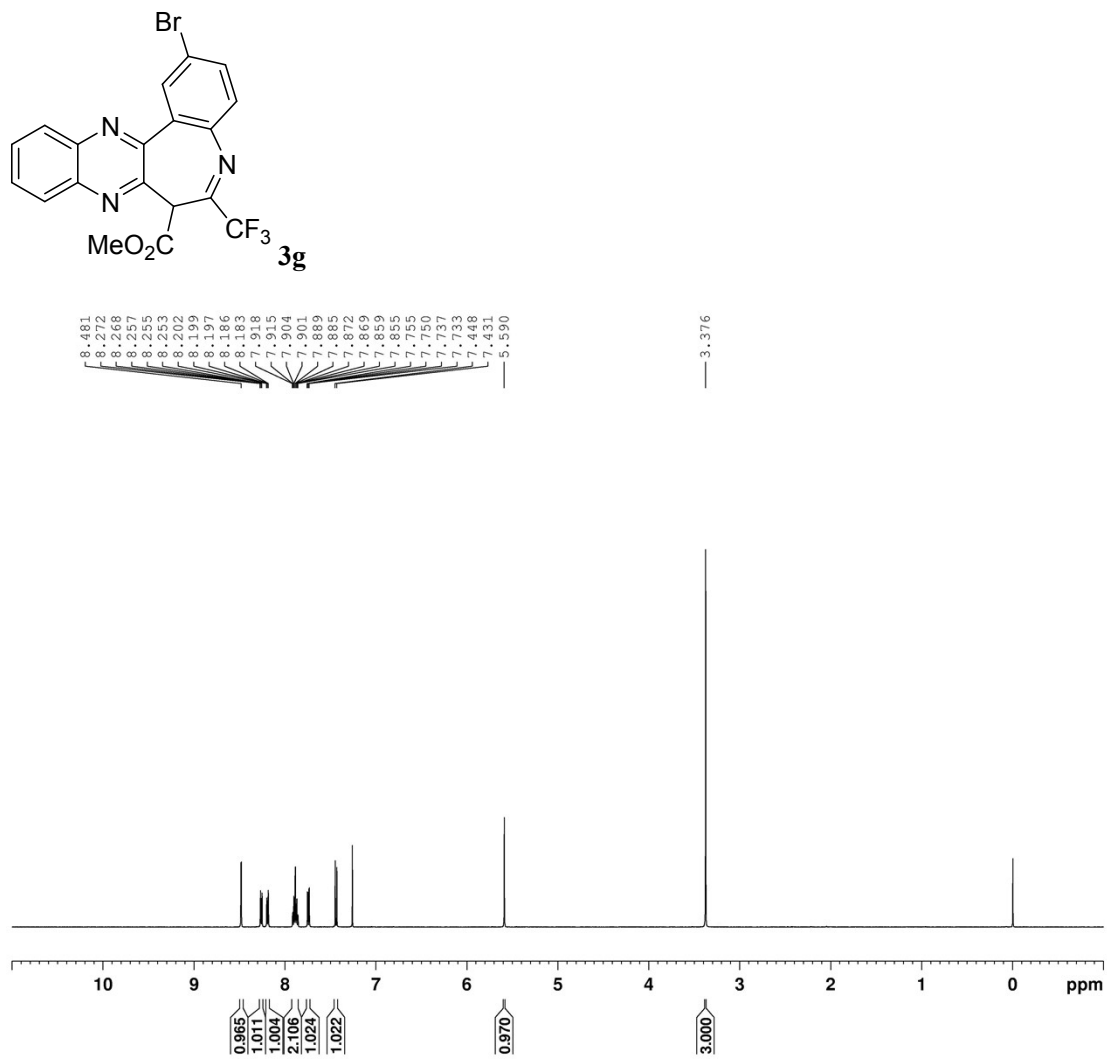

Fig S36. <sup>1</sup>H NMR of **3g** in CDCl<sub>3</sub>

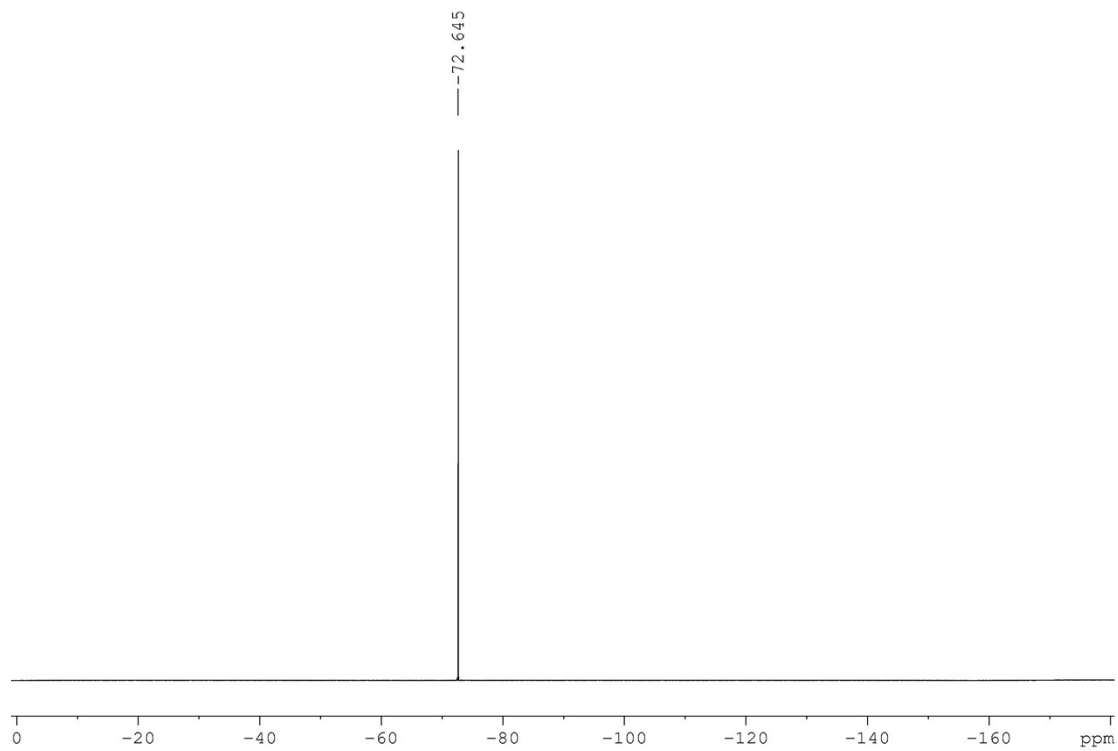

Fig S37.  $^{19}\text{F}$  NMR of **3g** in  $\text{CDCl}_3$

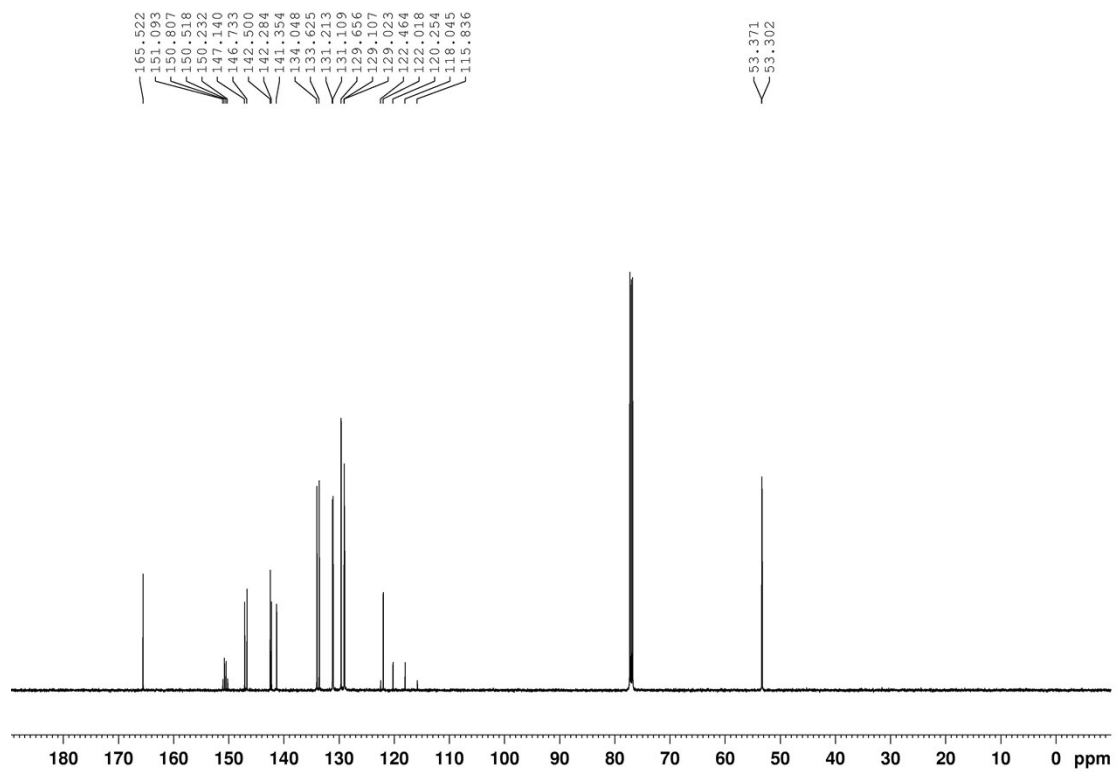

Fig S38.  $^{13}\text{C}$  NMR of **3g** in  $\text{CDCl}_3$

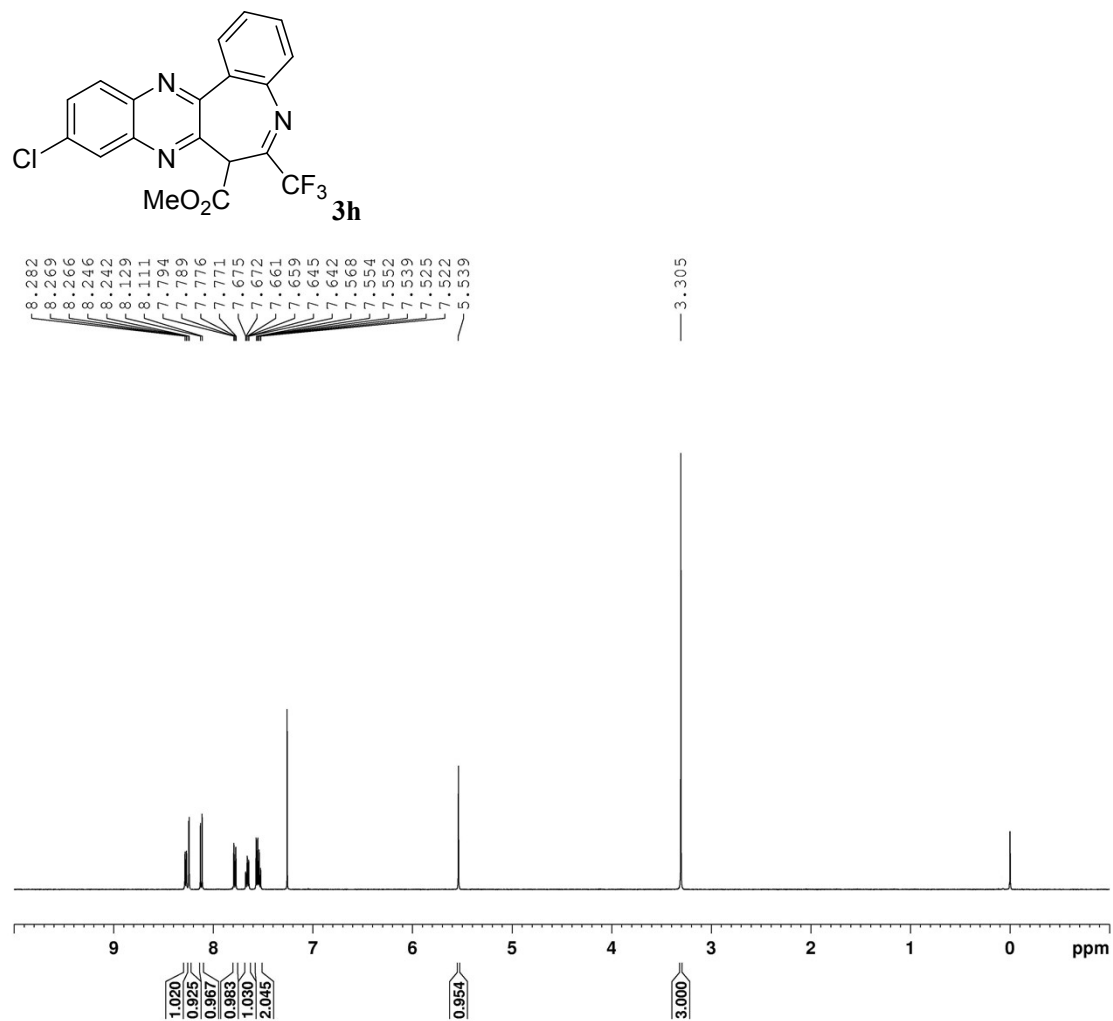

Fig S39. <sup>1</sup>H NMR of **3h** in CDCl<sub>3</sub>

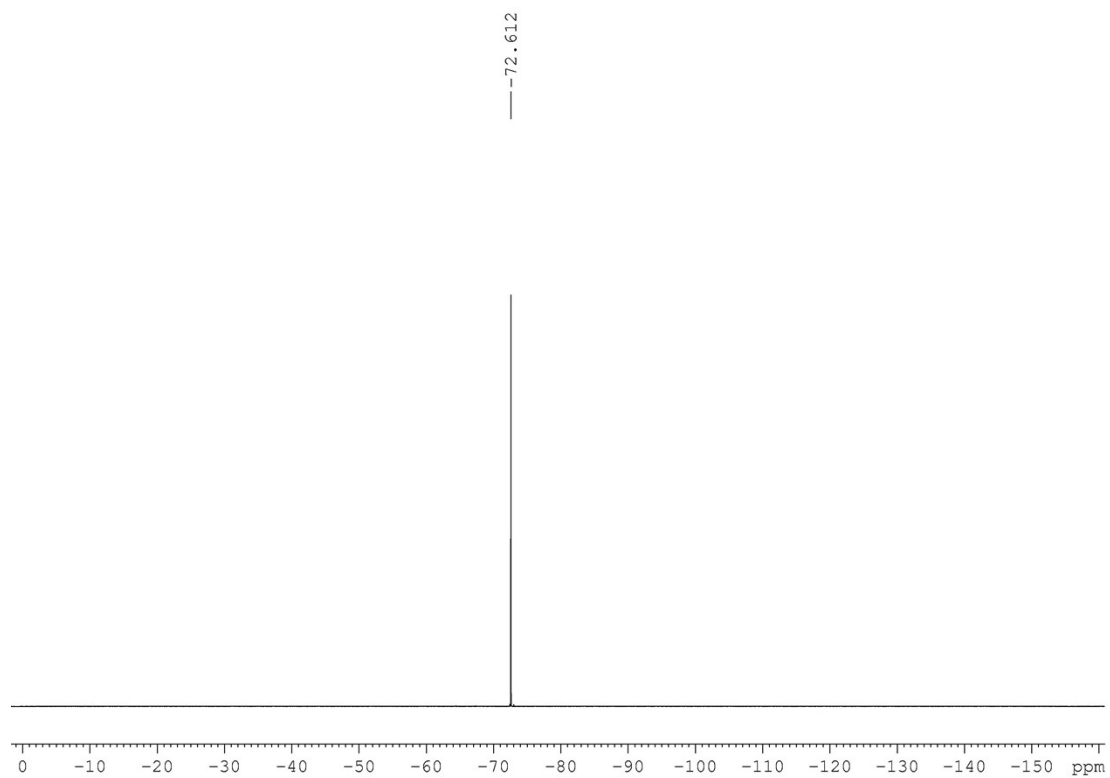

Fig S40. <sup>19</sup>F NMR of **3h** in CDCl<sub>3</sub>

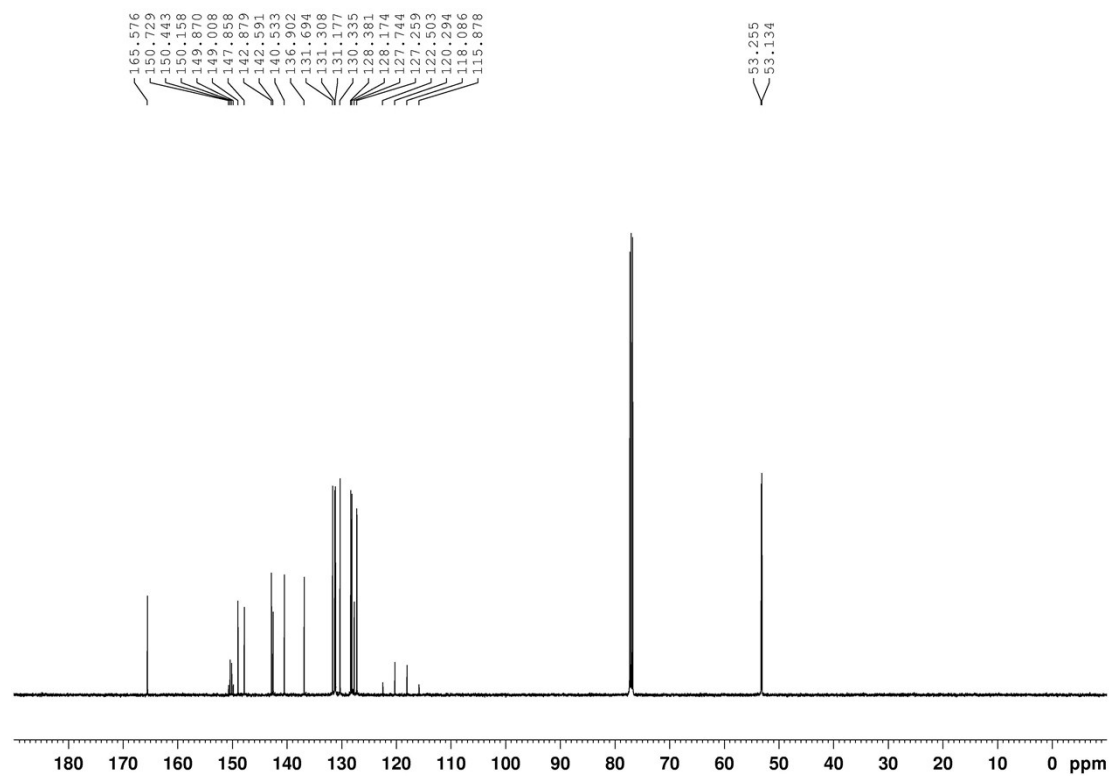

Fig S41. <sup>13</sup>C NMR of **3h** in CDCl<sub>3</sub>

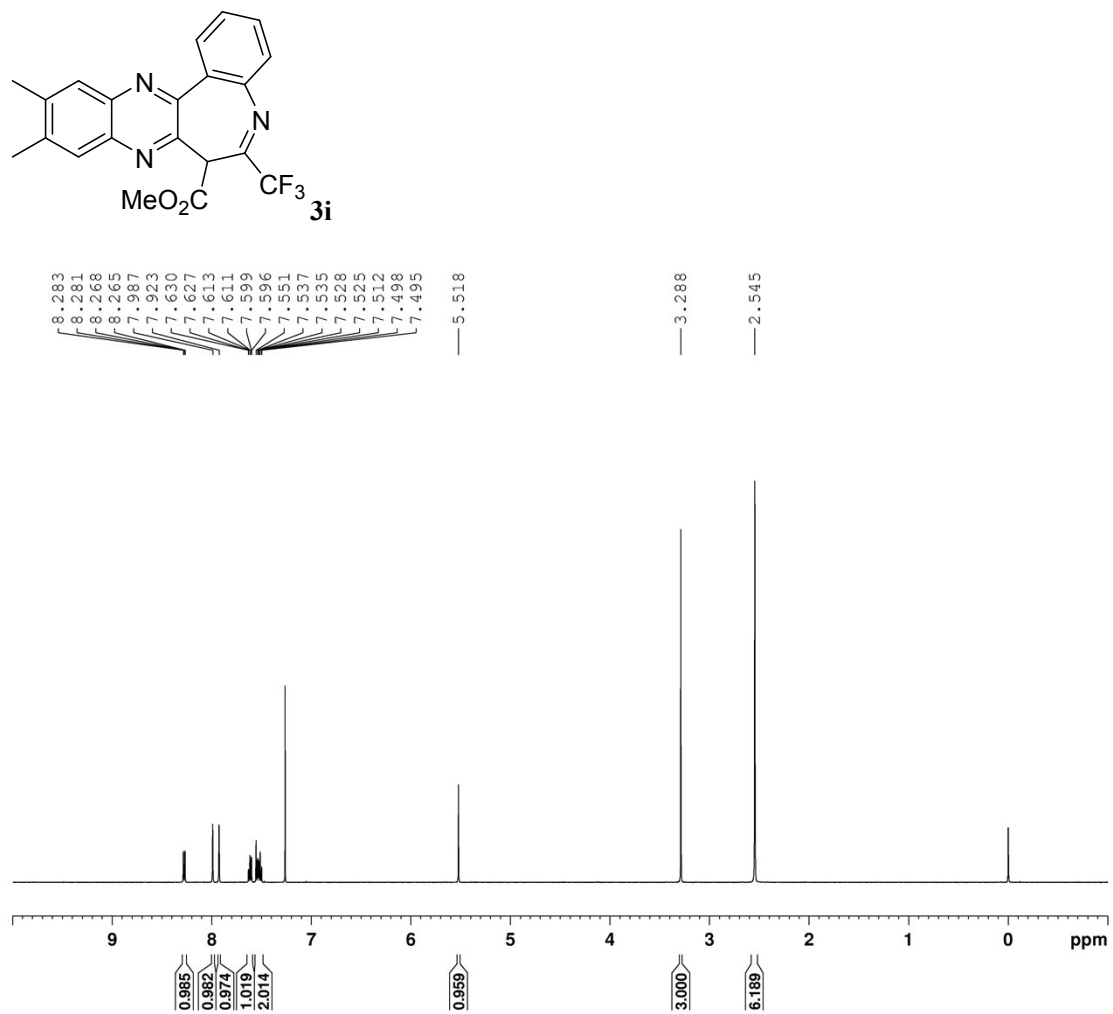

Fig S42. <sup>1</sup>H NMR of **3i** in CDCl<sub>3</sub>

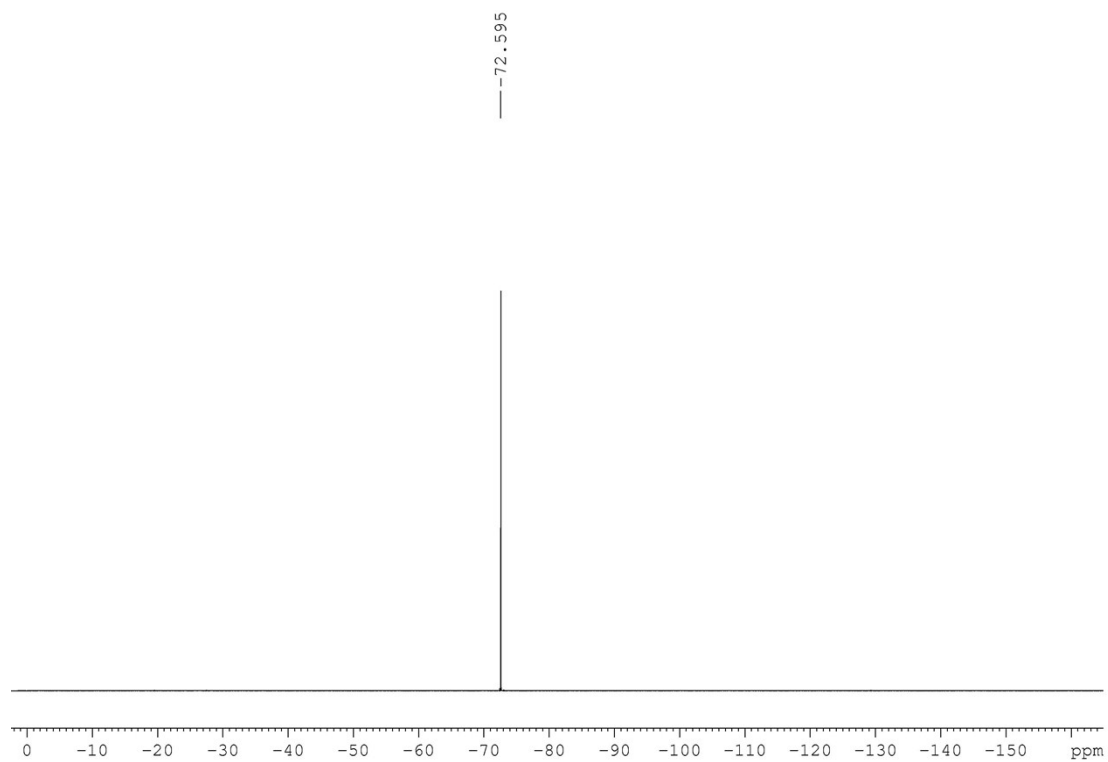

Fig S43.  $^{19}\text{F}$  NMR of **3i** in  $\text{CDCl}_3$

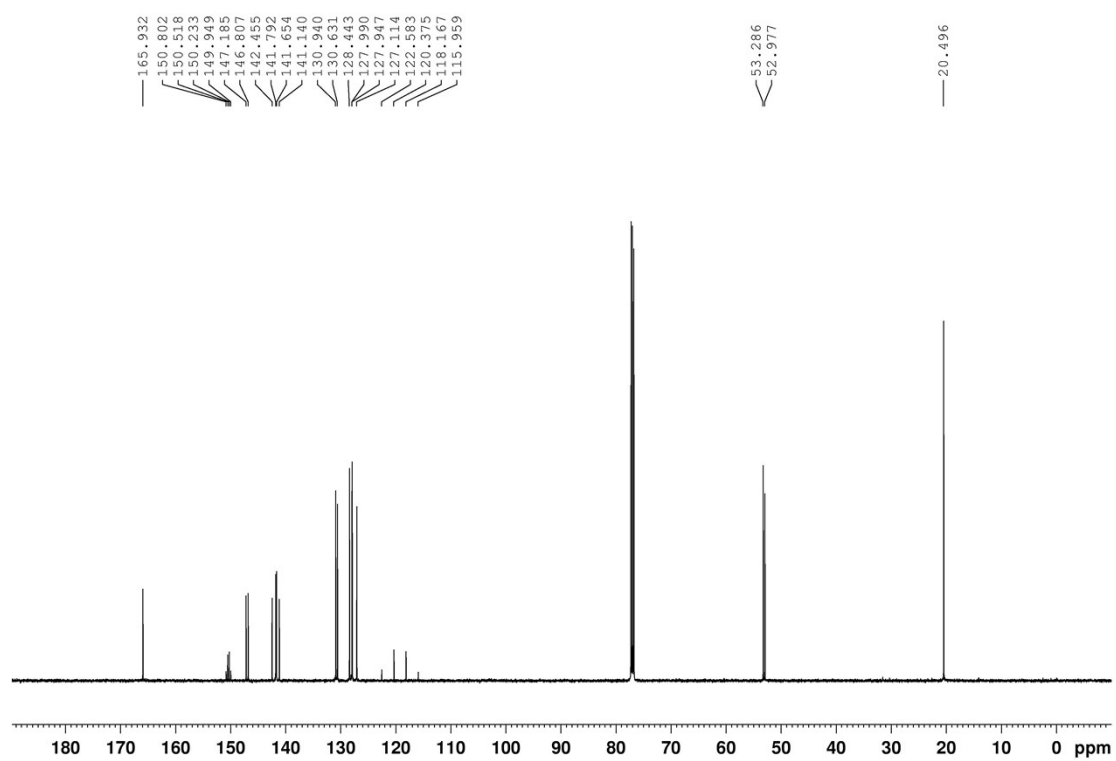

Fig S44.  $^{13}\text{C}$  NMR of **3i** in  $\text{CDCl}_3$

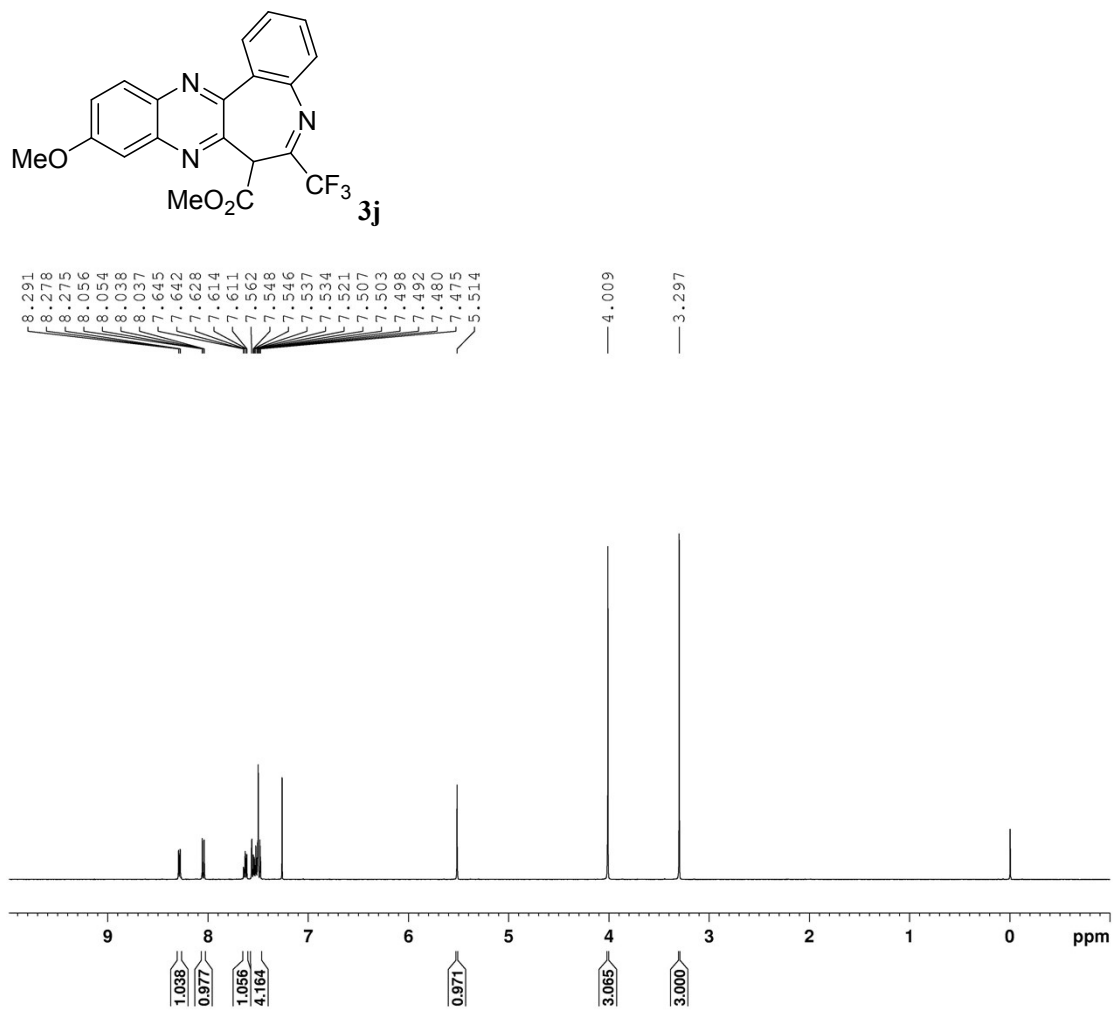

Fig S45. <sup>1</sup>H NMR of **3j** in CDCl<sub>3</sub>



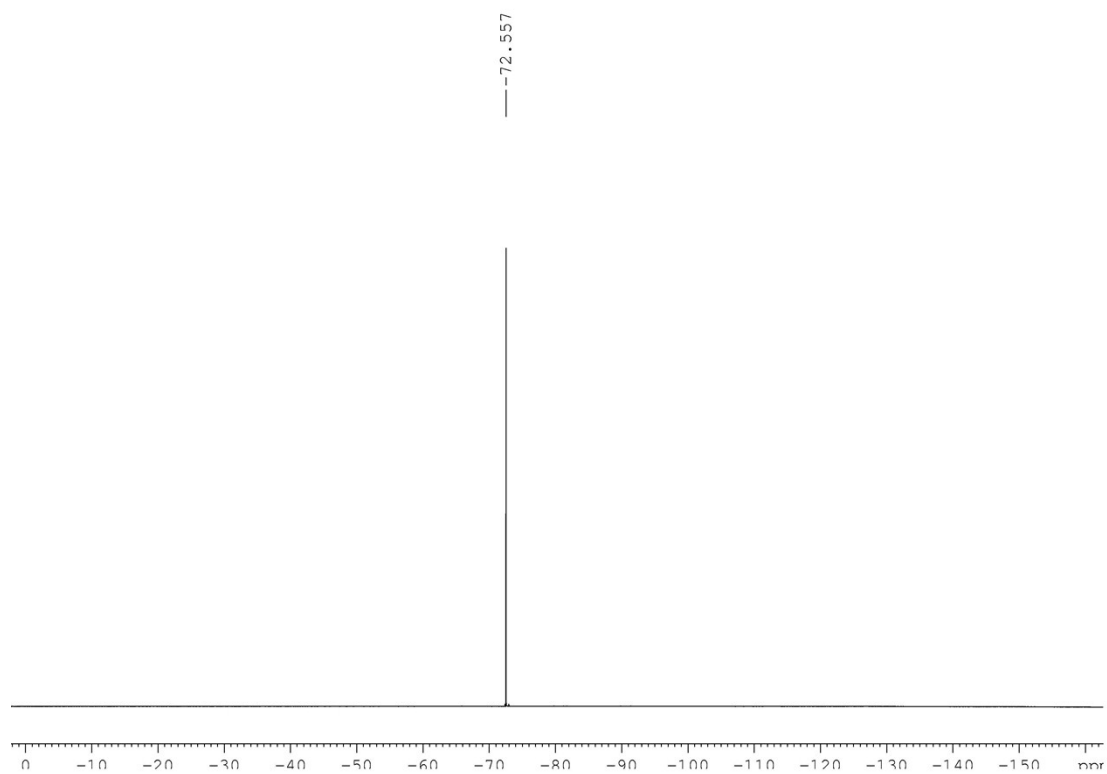

Fig S46.  $^{19}\text{F}$  NMR of **3j** in  $\text{CDCl}_3$

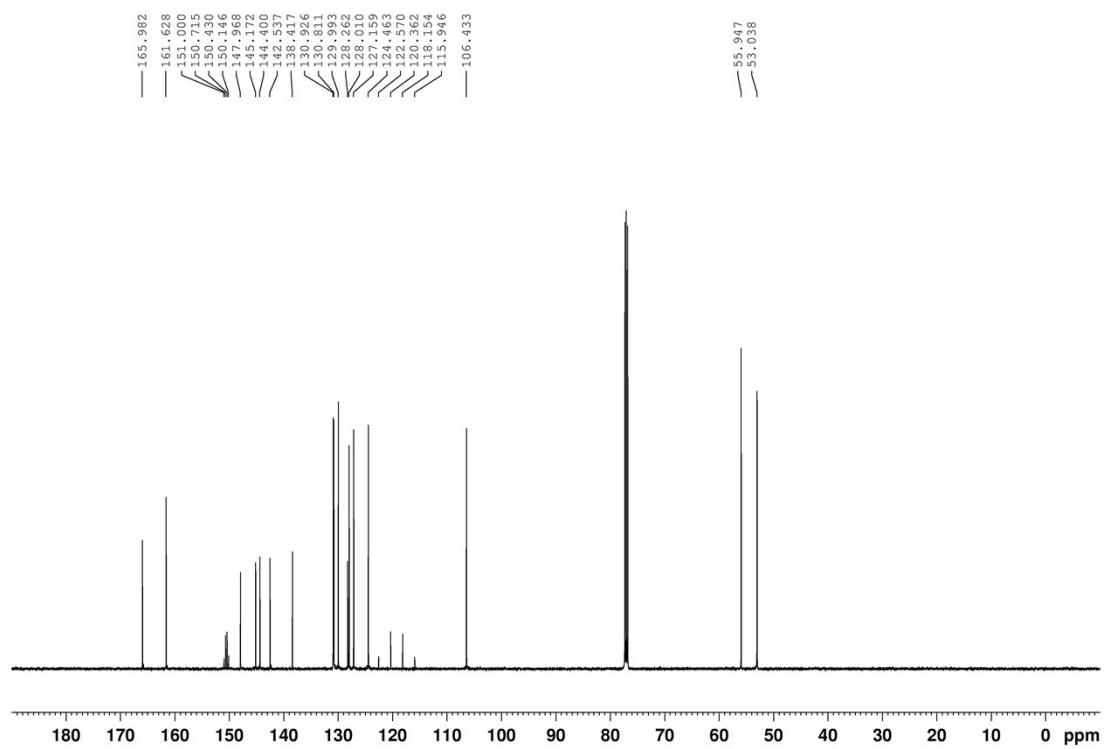

Fig S47.  $^{13}\text{C}$  NMR of **3j** in  $\text{CDCl}_3$

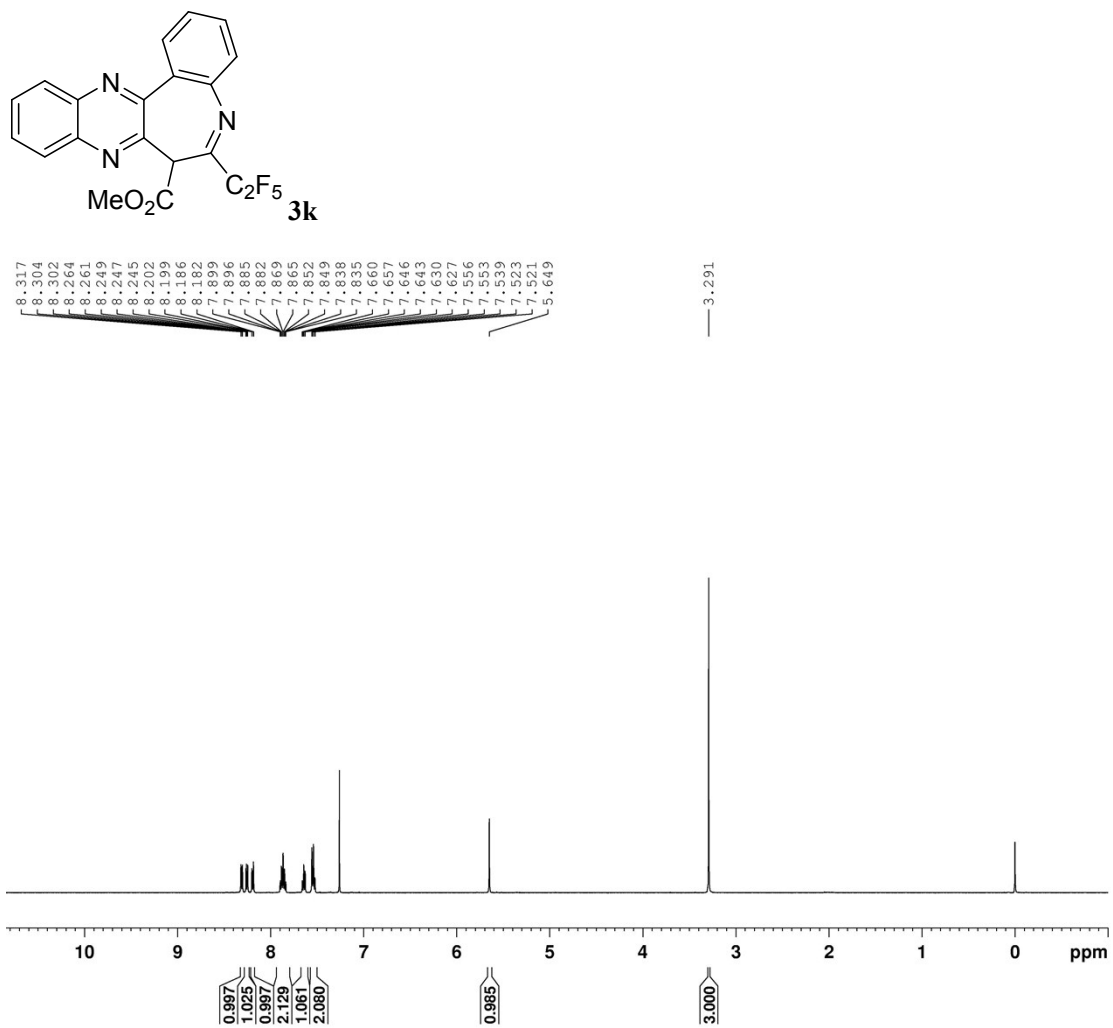

Fig S48. <sup>1</sup>H NMR of **3k** in CDCl<sub>3</sub>

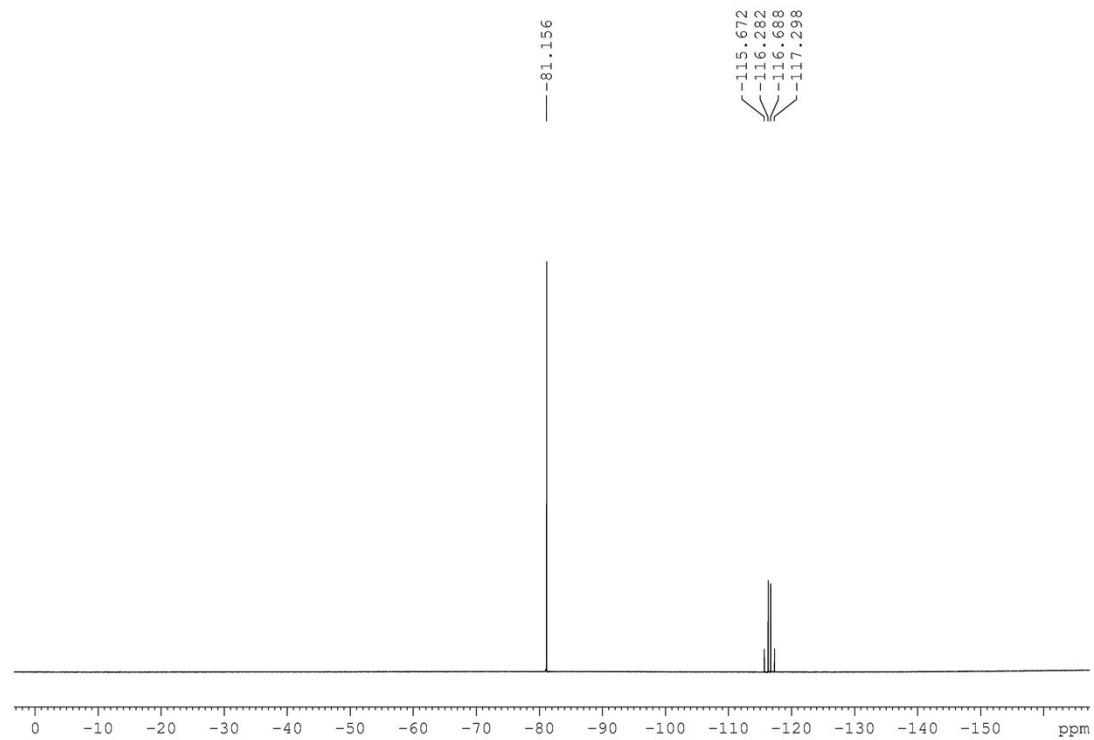

Fig S49.  $^{19}\text{F}$  NMR of **3k** in  $\text{CDCl}_3$

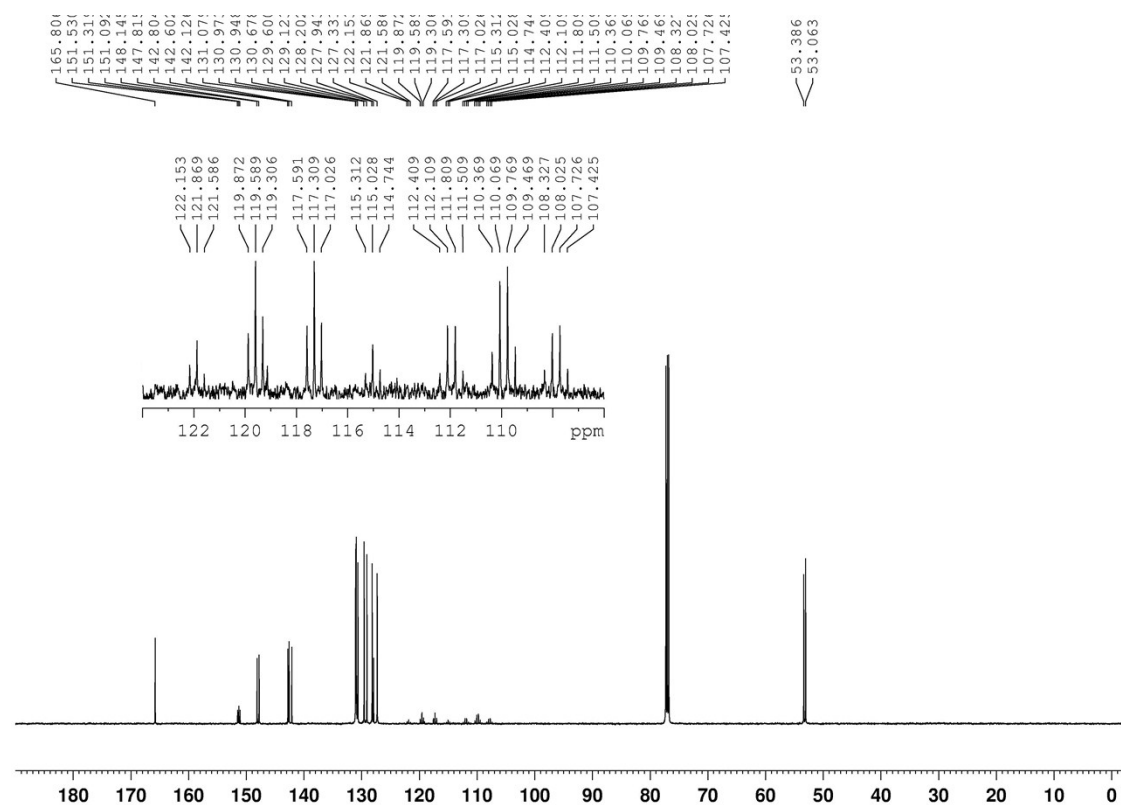

Fig S50.  $^{13}\text{C}$  NMR of **3k** in  $\text{CDCl}_3$

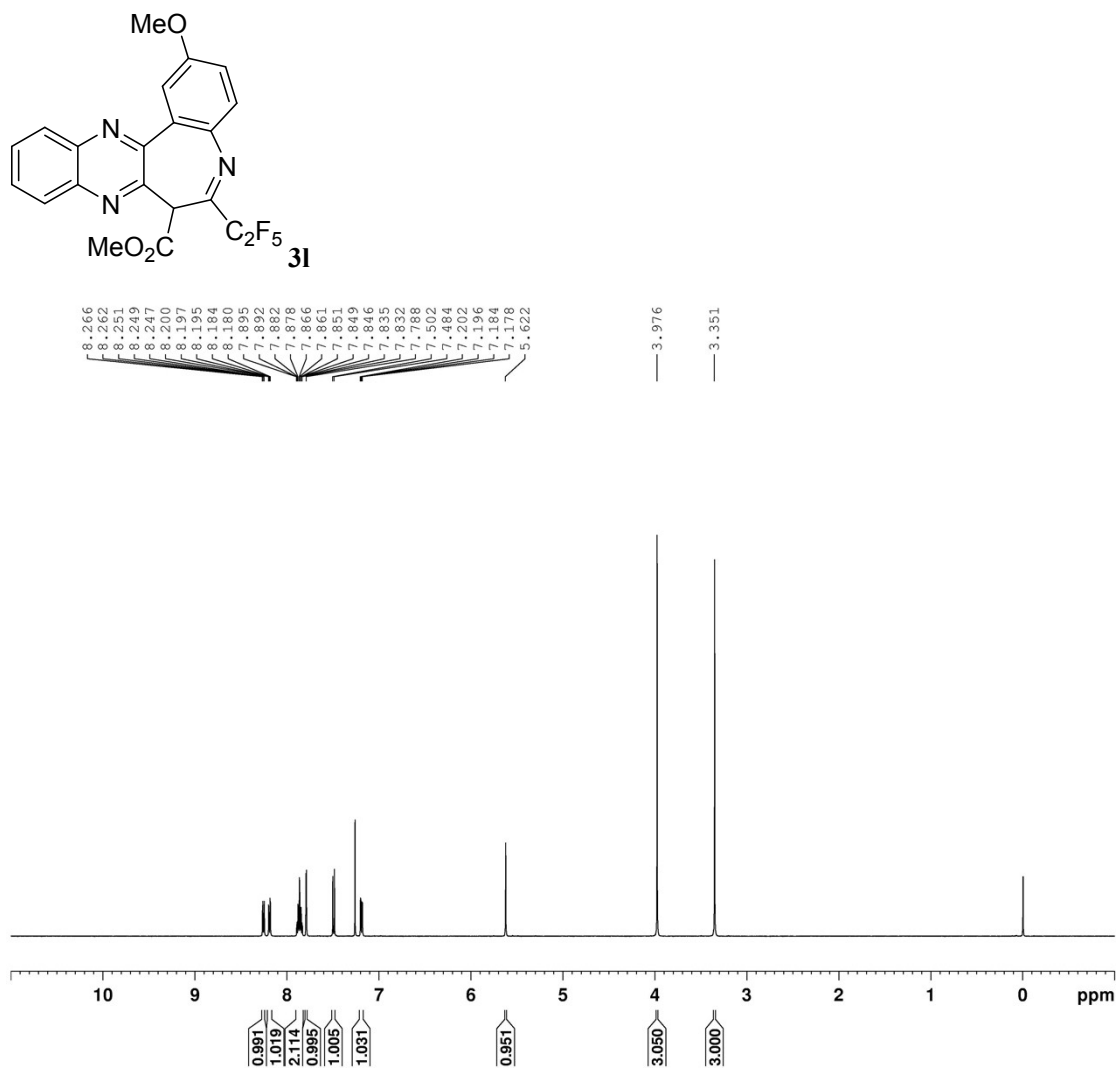

Fig S51.  $^1H$  NMR of **31** in  $CDCl_3$

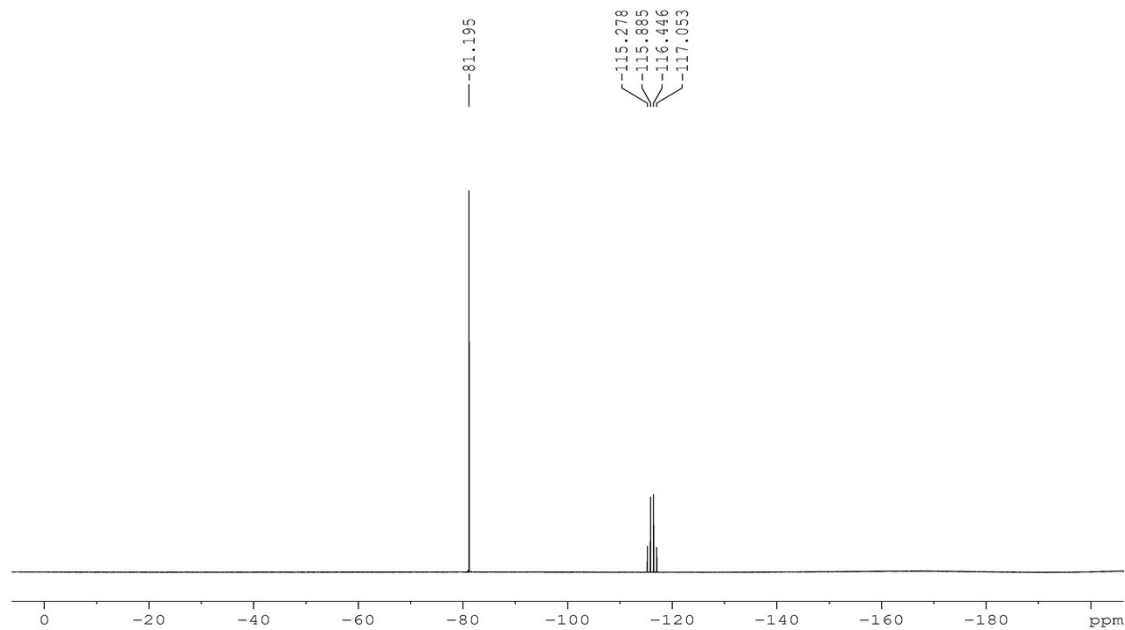

Fig S52.  $^{19}\text{F}$  NMR of **31** in  $\text{CDCl}_3$

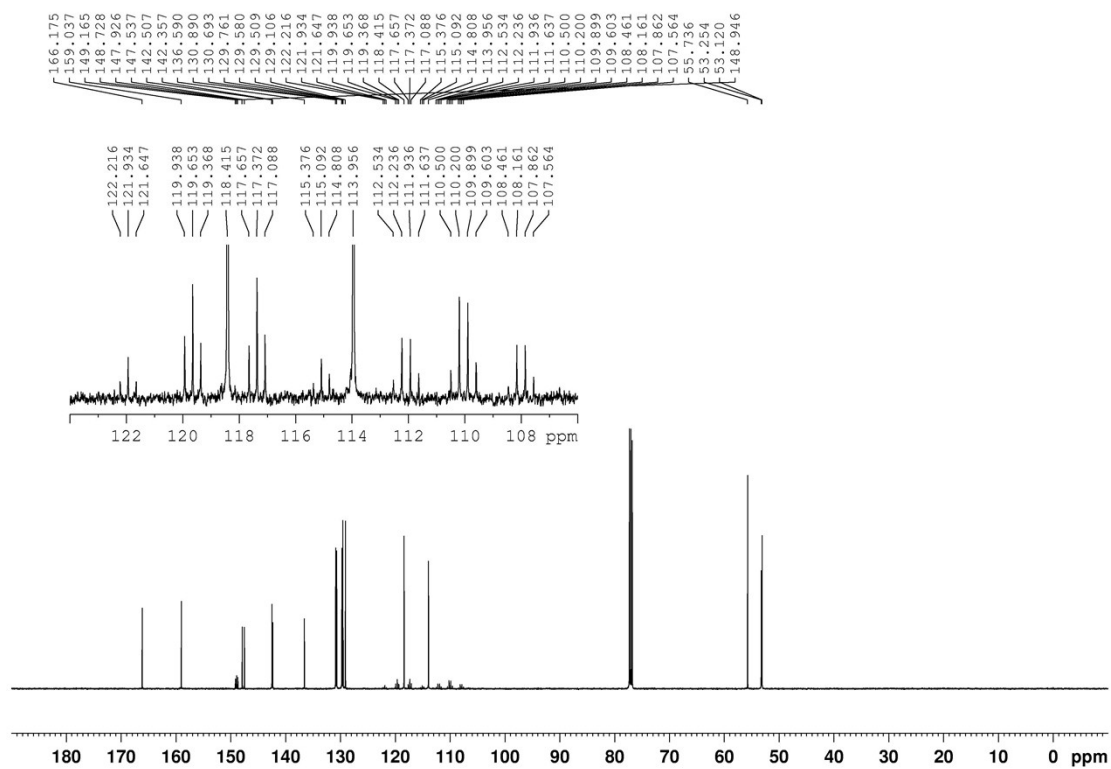

Fig S53.  $^{13}\text{C}$  NMR of **31** in  $\text{CDCl}_3$

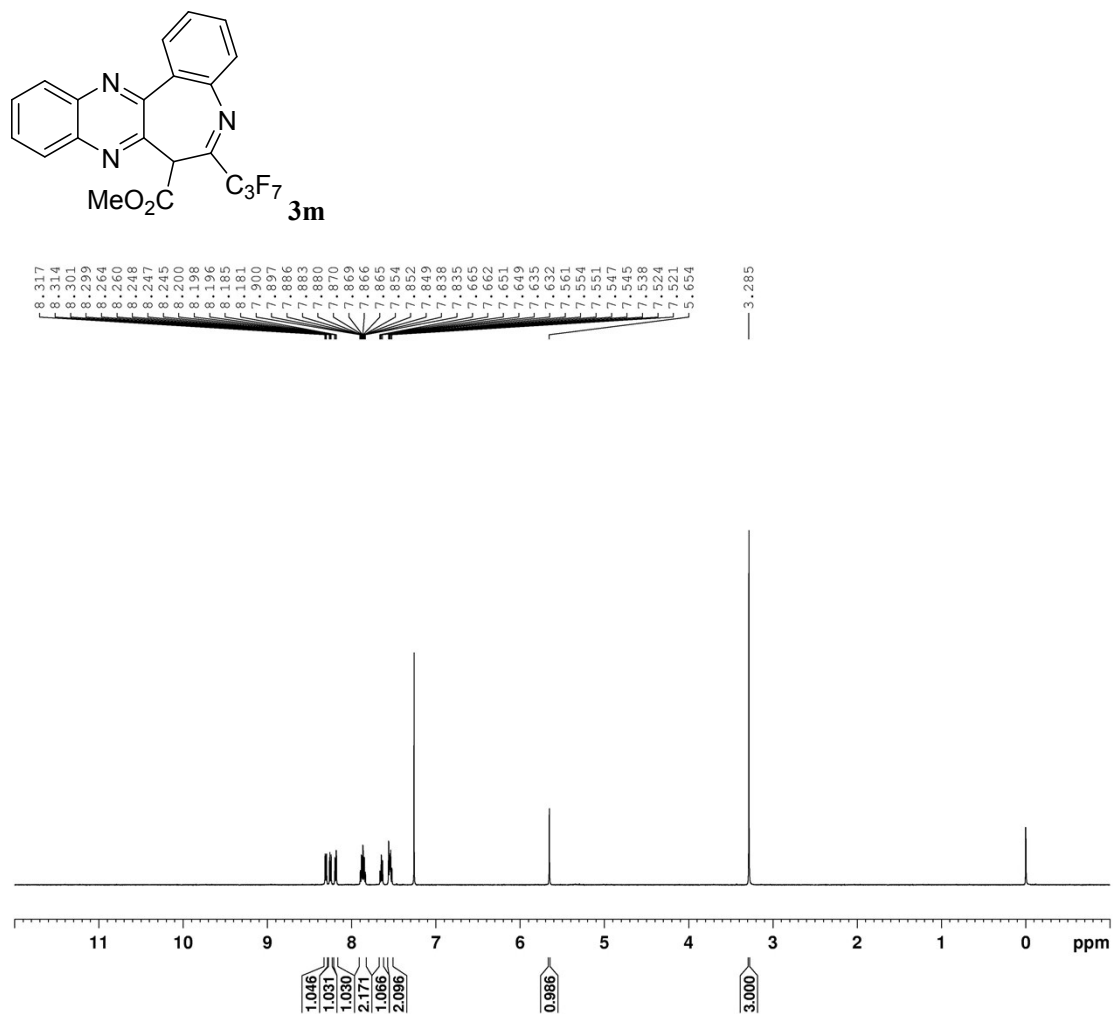

Fig S54. <sup>1</sup>H NMR of **3m** in CDCl<sub>3</sub>

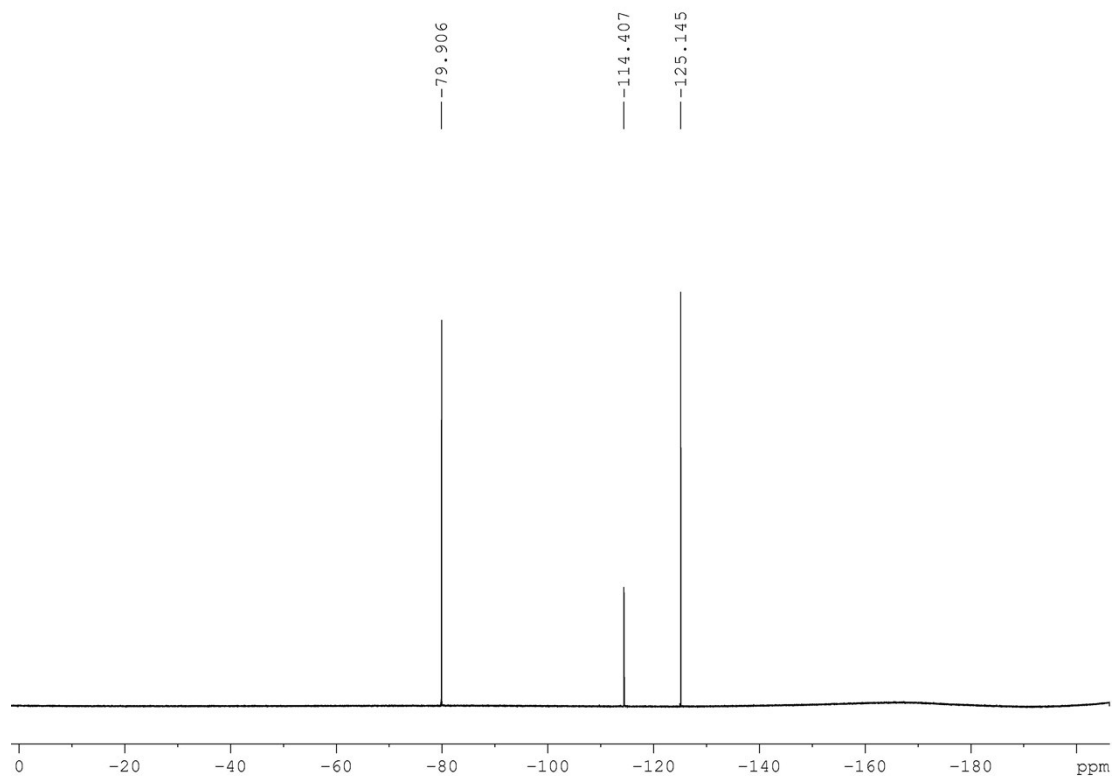

Fig S55.  $^{19}\text{F}$  NMR of **3m** in  $\text{CDCl}_3$

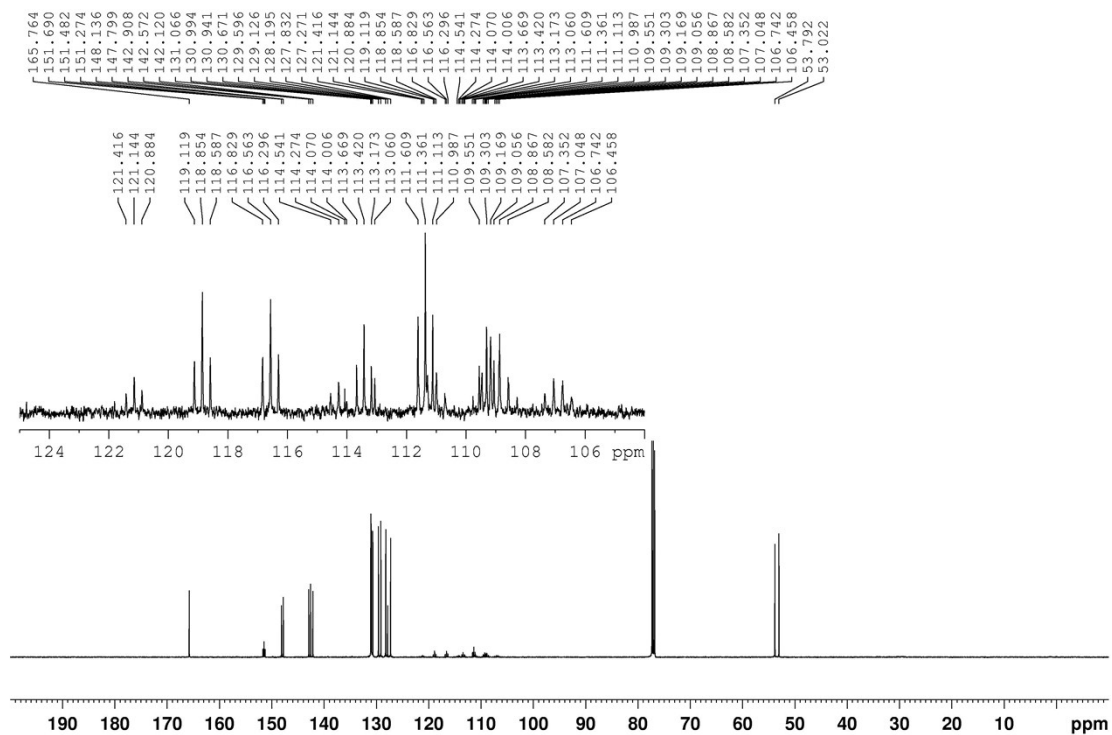

Fig S56.  $^{13}\text{C}$  NMR of **3m** in  $\text{CDCl}_3$

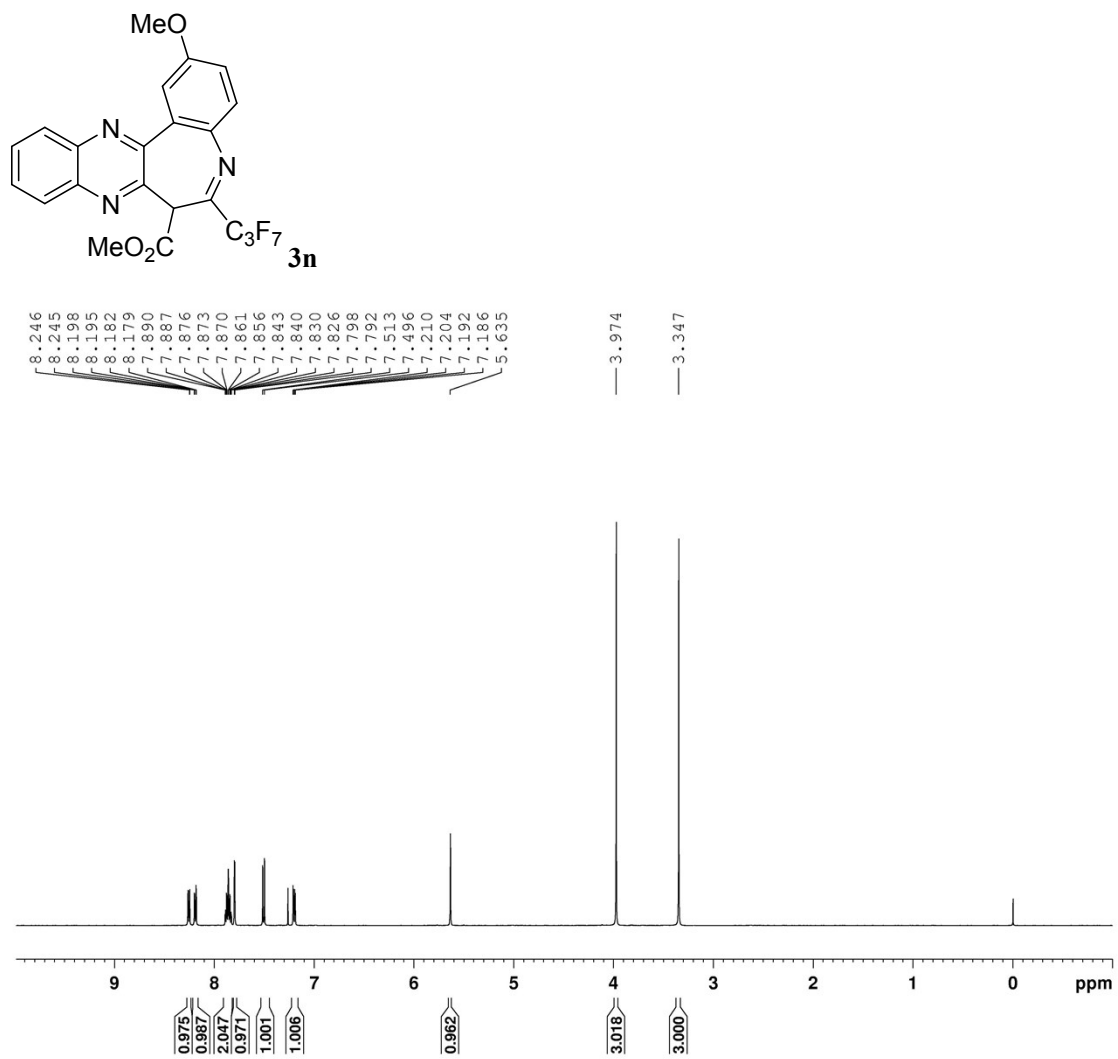

Fig S57.  $^1H$  NMR of **3n** in  $CDCl_3$



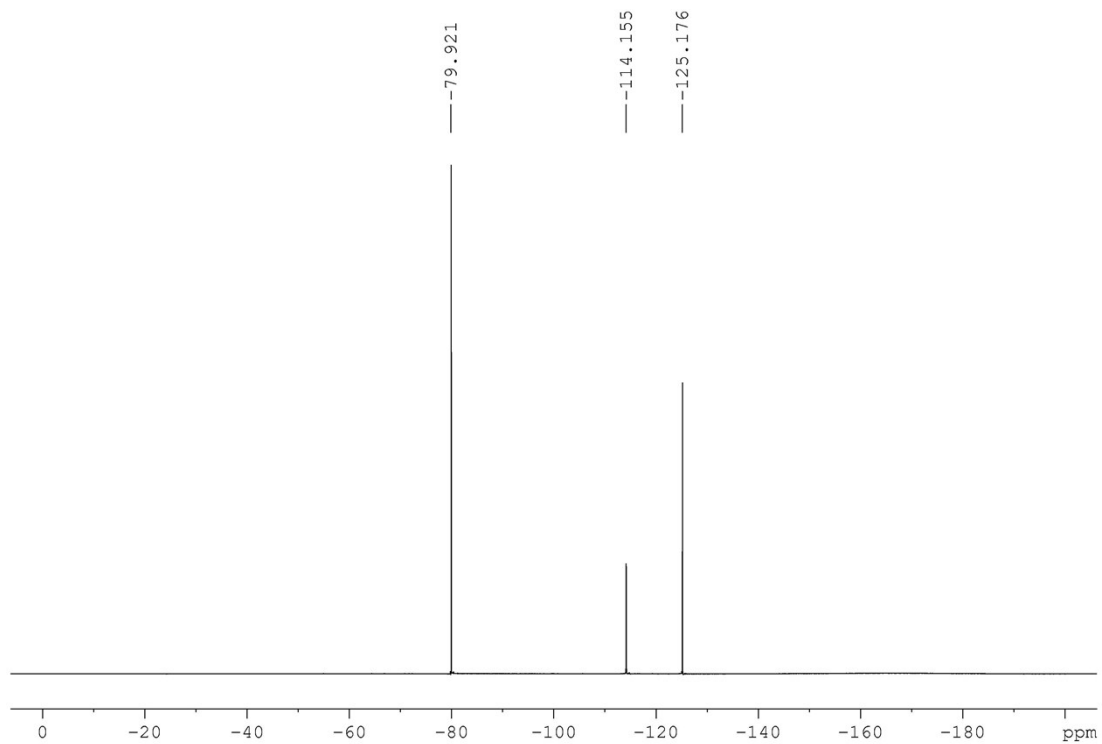

Fig S58.  $^{19}\text{F}$  NMR of **3n** in  $\text{CDCl}_3$

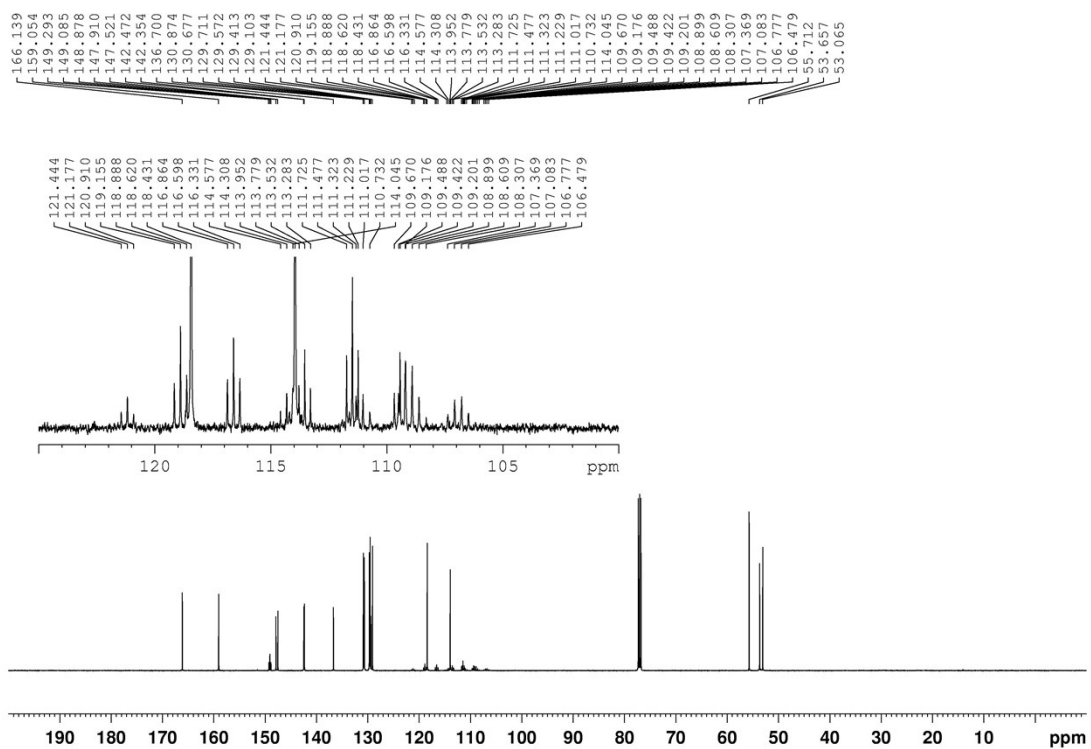

Fig S59.  $^{13}\text{C}$  NMR of **3n** in  $\text{CDCl}_3$
